1 **Original Article**

2 **Arabidopsis species deploy distinct strategies to cope with drought stress**

3 M. Bouzid<sup>1</sup>, F. He<sup>1</sup>, G. Schmitz<sup>1</sup>, R.E. Häusler<sup>1</sup>, A.P.M. Weber<sup>2</sup>, T. Mettler-Altmann<sup>2</sup>, J.  
4 de Meaux<sup>1,\*</sup>.

5

6 <sup>1</sup>Institute of Botany, Biozentrum, University of Cologne, Zùlpicher Str. 47b, 50674  
7 Cologne, Germany; <sup>2</sup>Institut of plant biochemistry, Heinrich-Heine-Universität,  
8 Universitätsstr. 1, 40225 Düsseldorf, Germany.

9

10 Author for correspondence:

11 \*Juliette de Meaux

12 Tel: +492214708213

13 E-mail: [jdemeaux@uni-koeln.de](mailto:jdemeaux@uni-koeln.de)

14

15

16

17

18

19

1

## 2 ABSTRACT

- 3 • **Background and Aims** Water limitation is an important determinant of the  
4 distribution, abundance and diversity of plant species. Yet, little is known about how  
5 the response to limiting water supply changes among closely related plant species  
6 with distinct ecological preferences. Comparison of the model annual species *A.*  
7 *thaliana* to its close perennial relatives *A. lyrata* and *A. halleri*, can help disentangle  
8 the molecular and physiological changes contributing to tolerance and avoidance  
9 mechanisms, because these species must maintain tolerance and avoidance  
10 mechanisms to increase long-term survival, but they are exposed to different levels of  
11 water stress and competition in their natural habitat.
- 12 • **Methods** We conducted a dry-down experiment that mimics a period of missing  
13 precipitation. We quantified the covariation of progressive decrease in soil water  
14 content (SWC) with various physiological and morphological plant traits across a set  
15 of representative genotypes in *Arabidopsis thaliana*, *A. lyrata* and *A. halleri*. To  
16 quantify the degree of plant stress, transcriptome changes were also monitored.
- 17 • **Key Results** The analysis of trait co-variation demonstrates that the three species  
18 differ in the strategies they deploy to respond to drought stress. *A. thaliana* showed  
19 drought avoidance reaction but failed to survive wilting. *A. lyrata* efficiently  
20 combined avoidance and tolerance mechanisms. By contrast, *A. halleri* showed some  
21 degree of tolerance to wilting but it did not seem to protect itself from the stress  
22 imposed by drought. Transcriptome data collected just before plant wilting and after

1 recovery corroborated the phenotypic analysis, with *A. lyrata* and *A. halleri* showing a  
2 stronger activation of recovery- and stress-related genes, respectively.

3 • **Conclusions** We conclude that these three *Arabidopsis* species have evolved distinct  
4 strategies to face drought stress, and discuss the extent to which these strategic  
5 differences reflect their respective ecological priorities.

6 **Key words:** *Arabidopsis halleri*, *Arabidopsis lyrata*, *Arabidopsis thaliana*, avoidance  
7 strategy, drought stress response, evolution, plant wilting, tolerance strategy

## 8 INTRODUCTION

9 All physiological and cellular plant aspects depend on water, so limitation in its supply is  
10 a major abiotic stress restricting plant growth and crop yield (Stebbins, 1952; Boyer,  
11 1982; Bohnert *et al.*, 1995; Bray, 1997, Lambers *et al.*, 1998; Bray *et al.*, 2000). Water  
12 limitation is also a crucial determinant of the distribution, abundance and diversity of  
13 plant species (Hoffmann & Sgró, 2011).

14 All spermatophytes possess the molecular toolkit to tolerate intense cellular dehydration  
15 in seeds (Golovina *et al.*, 1997; Kermode, 1997; Wehmeyer & Vierling, 2000). Adult  
16 plants can draw from this toolbox to tolerate a certain degree of dehydration in vegetative  
17 organs (Ludlow, 1989; Shinozaki & Yamaguchi-Shinozaki, 2007). This tolerance strategy  
18 relies on osmotic adjustment via the accumulation of an array of solutes, such as amino-  
19 acids, sugars, or dehydrins (Close, 1996). The expression of heat shock proteins,  
20 chaperones, or late embryogenesis abundant (LEA) proteins can further help to protect  
21 the cell against damages imposed by low internal water potential (Ingram & Bartels,  
22 1996; Reddy *et al.*, 2004, Yue *et al.*, 2006; Szabados, 2010).

1 However, plants have evolved additional strategies to handle drought stress: escape and  
2 avoidance (Ludlow, 1989; Fukai & Cooper, 1995; Verslues & Juenger, 2011; Fang &  
3 Xiong, 2015). The escape strategy is based on the adjustment of developmental  
4 transitions to elude direct exposure to drought. With an increase in the duration of seed  
5 dormancy or a shortening of the life cycle, the plant is simply not facing dry seasons  
6 (Fox, 1990; Bewley, 1997; Tonsor *et al.*, 2005; Franks *et al.*, 2007; Kronholm *et al.*,  
7 2012; Lovell *et al.*, 2013). The avoidance strategy, instead, seeks to maintain water levels  
8 within tissues through a reduction of water loss and the enhancement of water uptake, so  
9 that the plant bypasses the damaging effects of drought (Levitt, 1980; Ludlow, 1989;  
10 Price *et al.*, 2002; Farooq *et al.*, 2009; Munemasa *et al.*, 2015).

11 The relative importance of strategies to cope with drought stress is expected to be  
12 intimately linked to the life history and ecology of species. Indeed, tolerance, avoidance,  
13 and escape strategies are not independent in evolution (Grime, 1977). Trade-offs between  
14 growth and tolerance can constrain their optimization (McKay *et al.*, 2003, Steven, 2011).  
15 Annual species prioritize the escape strategy, which in turn can release the need for  
16 tolerance mechanisms (Kooyers, 2015). Perennial species, by contrast, must maintain  
17 tolerance mechanisms to increase long-term survival.

18 Dehydration triggers dramatic responses in plant cells, as indicated by the fast and  
19 extensive changes in gene transcript levels (Shinozaki & Yamaguchi Shinozaki, 2000;  
20 Iuchi *et al.*, 2001; Seki *et al.*, 2001; Shinozaki & Yamaguchi, 2007; Matsui *et al.*, 2008;  
21 Harb *et al.*, 2010). Part of this response is regulated by the key drought-stress hormone  
22 abscisic acid (ABA), but ABA-independent transcriptional regulation also plays an  
23 important role (Iuchi *et al.*, 2001; Seki *et al.*, 2001; Sakuma *et al.*, 2006; Yoshida *et al.*,  
24 2014; Urano *et al.*, 2017). The complex architecture of gene regulatory responses to stress  
25 is believed to contribute to restricting the reactions at cell and whole-plant levels when

1 the internal water potential drops (Bray, 1997; Szabados, 2010; Osakabe *et al.*, 2014). By  
2 articulating growth and stress responses, transcriptomic changes take part in both the  
3 deployment of avoidance strategies and the promotion of recovery from stress, yet they  
4 also reveal the degree of stress sensed by the organisms. Distantly related annual species,  
5 such as rice and *Arabidopsis*, show common patterns of stress responses (Nakashima *et*  
6 *al.*, 2009). Much less is known about how responses to stress are reshaped in closely  
7 related species with strongly divergent ecologies and life-histories.

8 Comparison of *A. thaliana* to its close relatives can help disentangle the molecular  
9 changes contributing to tolerance and avoidance mechanisms, because different species in  
10 the genus have evolved distinct ecologies with contrasting demands on tolerance and  
11 avoidance (Clauss & Koch, 2006). The model species *A. thaliana* shows a broad  
12 distribution range from north of Scandinavia to Africa (Hoffmann, 2005, Durvasula *et al.*,  
13 2017). Its response to severe or mild drought stress has been described in detail (Seki *et*  
14 *al.*, 2002; Bray, 2004; Verslues & Juenger, 2011; Des Marais *et al.*, 2012; Juenger, 2013;  
15 Bechtold *et al.*, 2015; Lovell *et al.*, 2015). Several studies point to the adaptive relevance  
16 of its variation (Kesari *et al.*, 2012; Exposito-Alonso *et al.*, 2017). This annual species  
17 can also rely on modifications of its life cycle to adjust the timing of escape and/or  
18 avoidance strategies to drought threats (McKay *et al.*, 2003; Kronholm *et al.*, 2012;  
19 Wolfe & Tonsor, 2014). The two sister species *Arabidopsis lyrata* and *A. halleri*, by  
20 contrast, are less likely to rely on escape strategies because year-to-year survival is of  
21 major importance for these perennials. *A. lyrata* is probably the most exposed of the two  
22 to natural selection by drought due to its preference for low competitive communities in  
23 soils that do not retain water (Clauss & Koch, 2006; Ellenberg & Leuschner, 2010;  
24 Sletvold & Agren, 2012). *A. halleri*, instead, must grow to out-compete other species in  
25 crowded habitats (Clauss & Koch, 2006; Ellenberg & Leuschner, 2010; Stein *et al.*,

1 2017). Its specific ability to accumulate heavy metals enhances its defenses against  
2 herbivores but sets strong constitutive demands on detoxifying systems which are  
3 important for reestablishing homeostasis after stress (Mittler, 2002; Becher *et al.*, 2004;  
4 Krämer & Clemens, 2006; Stolpe *et al.*, 2016). The contrasted ecologies of these three  
5 species thus predict major consequences on their strategies to face up with the challenges  
6 imposed by water limitations.

7 To test this prediction, we set up an experiment to infer the response strategy to drought  
8 of sets of accessions representative of the three species *A. thaliana*, *A. halleri* and *A.*  
9 *lyrata*. For this, we measured plant drought reaction at both phenotypic and  
10 transcriptomic levels in a dry-down experiment that mimics the progression of water  
11 depletion in natural conditions. Our data showed that species deploy different avoidance  
12 and tolerance strategies in response to decreasing levels of soil water content (SWC).

## 13 MATERIALS AND METHODS

### 14 *Plant material and growth conditions*

15 Altogether, 16 to 22 and 12 to 17 central European *A. lyrata* and *A. halleri* accessions,  
16 respectively, were included in the dry down experiments. The accessions were taken from  
17 populations representative of the diversity described in these species (Supplementary  
18 Table S1, Pauwels *et al.*, 2005; Ross-Ibarra *et al.*, 2008; Novikova *et al.*, 2016; Stein *et*  
19 *al.*, 2017). They were compared to 16 *A. thaliana* accessions from Spain with European  
20 genomic background (The 1001 Genomes Consortium 2016). This sample was chosen  
21 because i) the populations are among the most drought resistant in *A. thaliana* (Exposito-  
22 Alonso *et al.*, 2017) and ii) are late flowering (Arapheno database, FT16, DOI:  
23 [10.21958/phenotype:262](https://doi.org/10.21958/phenotype:262)) so that the stress exposure cannot be circumvented by life cycle  
24 termination. For each accession, five replicates (vegetatively propagated clones for the

1 self-incompatible species, single-descent seeds for *A. thaliana*) were distributed in 5  
2 randomized complete blocks.

3 Plants were grown in 7x7x8 cm pots filled with 150 g of a well-homogenized mixture of  
4 VM soil (60 to 70% of peat and 30 to 40% of clay), perlite and seramis (clay granules) in  
5 a CLF controlled growth chamber (Perkin Elmer, USA). Growth conditions were 10 h  
6 (20°C): 14 h (16°C), light: dark, at a photon flux density (PFD) of 100  $\mu\text{mol m}^{-2} \text{s}^{-1}$   
7 supplemented with 10 min of dark-red light at the end of the day. Relative humidity was  
8 set to 60%.

### 9 *Dry-down experimental design*

10 Plants were grown for five weeks in the greenhouse, re-potted in weighed pots filled with  
11 the initial soil mixture, and transferred to the growth chamber. Soil moisture was  
12 quantified every day ( $X_t$ ) by monitoring pot mass with a precision balance with an  
13 accuracy of 0.01 g. To calculate the soil moisture, several pots were fully dried down in  
14 an oven to estimate the weight of dry soil ( $X_0$ ) in the initial soil mixture and subsequently  
15 saturated with water to determine the weight of 100% wet soil ( $X_f$ ). The percentage of soil  
16 moisture was calculated as  $[(X_t - X_0) / (X_f - X_0)] \times 100$ . For acclimation, plants were grown  
17 for two weeks in pots with 60% soil moisture. After acclimation, plants were not watered  
18 until showing first symptoms of wilting. Plants were re-watered two days after wilting.  
19 One to two weeks later survival and symptoms of damage were scored.

20 Three independent biological experiments were performed. We discarded any plant that  
21 was not healthy and vigorously growing at the start of the experiment. Focusing on  
22 initially healthy plants thus resulted in slight differences in the number of replicates  
23 and/or accessions (for details see Supplementary Table S1-S3). The two first experiments  
24 were used for phenotypic characterization and the third for sampling of leaf material for

1 RNA extraction. In the experiment, plants were re-watered on the day of wilting to allow  
2 collecting leaf material after recovery.

### 3 *Phenotypic trait measurements*

#### 4 *Phenotypic differences between species in well-watered conditions*

5 Three phenotypes were measured in *A. halleri* and *A. lyrata* in glasshouse-grown plants  
6 under well-watered conditions: stomatal density, stomata length, and carbon isotope  
7 discrimination ( $\delta^{13}\text{C}$ ). Stomatal density and length were quantified in fully-developed  
8 leaves of five replicates of nine accessions per species following protocol described by  
9 Paccard *et al.*, (2014).  $\delta^{13}\text{C}$  in one fully developed leaf was quantified for 4 replicates of  
10 the same nine accessions of each species according to the method used by Gowik *et al.*,  
11 (2011).

#### 12 *Phenotypic variation in response to soil dry-down*

13 Eight phenotypes were measured during the dry-down experiment. Rosette leaf area was  
14 quantified on day zero of the dry-down experiment, using ImageJ to separate green pixels  
15 from the background images and RosetteTracker (Vylder *et al.*, 2012) to convert total  
16 green pixel into  $\text{mm}^2$ . The first day we observed that leaves had lost their turgidity was  
17 scored as wilting day. Soil moisture was measured every day until the day of wilting. The  
18 rate of soil water loss was calculated for each pot over the first seven days after water  
19 withdrawal. Leaf lamina thickness was measured on one ink-marked medium-size leaf  
20 every second day using a digital ruler (HOLEX, Hoffmann Group, Knoxville, USA) with  
21 an accuracy of 0.03 mm. Efficiency of the photosynthetic light reaction was measured by  
22 Pulse-Amplitude-Modulation (PAM) fluorometry (Schreiber *et al.*, 1986) using the  
23 IMAGING-PAM-Series (M-Series-Maxi version, Heinz Walz GmbH, Effeltrich,



1 Germany). In order to gain information on the intactness of photosystem II (PSII) and  
2 hence its potential photosynthetic capacity, the maximum quantum efficiency of open  
3 PSII reaction centers ( $F_v : F_m$ , i.e. the ratio of variable to maximum Chl $a$  fluorescence)  
4 was determined (Genty *et al.*, 1989; Maxwell & Johnson, 2000). Before the application of  
5 a saturating light flash (duration 0.8 s), plants were dark-adapted for 30 min. Intact and  
6 non-stressed plants usually show an  $F_v : F_m$  ratio of around 0.8. Plants that developed new  
7 leaves within two weeks after re-watering were scored as having survived and the damage  
8 caused by wilting was quantified visually on a damage severity scale from one to five,  
9 reflecting the percentage of damaged leaf area, leaf color and leaf strength. The number  
10 of days of tolerated wilting was scored on plants that survived the first dry-down  
11 experiment. For this, plants were dried down a second time until wilting and re-watered  
12 after three, four, five, or six days of wilting. Despite previous exposure to drought stress,  
13 plants wilted at the same limiting SWC (e.g. approximately 20%), suggesting that if plant  
14 show differences in stress memory, this effect is not detectable after 3 weeks.  
15 Photosynthetic activity and duration of tolerated wilting were measured in the first  
16 experiment, whereas rosette area and leaf thickness were measured only in the second  
17 experiment (Supplementary Table S2).

### 18 *Statistical analysis of phenotypic variation*

19 All plots were created using the CRAN-package *ggplot2* (Wickham, 2009). We used  
20 generalized linear models (R function *glm*) and multiple comparison tests using the  
21 *Simultaneous Inference in General Parametric Models* package named *multcomp* and  
22 Tukey's Honest Significant Difference test (Tukey HSD). For each phenotype, we ran  
23 several models. As we did not detect any block effect for the different measured traits, we  
24 removed it from our models. Following are the different tested models, and later in the  
25 results part, we will mention which was the best model:

1 (M1) tests the accessions nested within species effect

2  $Y_{ijk} = \mu + \alpha_i \text{ species} + \beta_{ij} (\text{species } i \text{ accession } j) + \varepsilon_{ijk}$

3 (M2) tests only the species effect when the accession effect is not significant

4  $Y_{ij} = \mu + \alpha_i \text{ species } i + \varepsilon_{ij}$

5 (M3) tests the interaction between species and time effect

6  $Y_{ijk} = \mu + \alpha_i \text{ species } i + \beta_j \text{ time } j + \gamma_{ij} (\text{species } i \text{ time } j) + \varepsilon_{ijk}$

7 (M4) tests the effect of interaction between species and the cofactor of interest

8  $Y_{ijk} = \mu + \alpha_i \text{ species } i + \beta_j \text{ cofactor } j + \gamma_{ij} (\text{species } i \text{ cofactor } j) + \varepsilon_{ijk}$

9 Where:

10 Y: quantitative dependent variable e.g. measured phenotypic trait;  $\mu$ : is the overall mean;  
11  $\alpha$ ,  $\beta$ , and  $\gamma$ : regression coefficients; species; accession; time; cofactor (e.g. initial rosette  
12 size, desiccation rate, initial leaf thickness, damage scores, days after wilting etc.):  
13 independent variables with the different levels i, j, and k;  $\varepsilon$ : prediction error.

14 Different error distributions were specified for each phenotypic trait, depending on whether or not  
15 overdispersion was detected (i.e. whether the residual deviance was of the order of magnitude of  
16 the degrees of freedom). A negative binomial fitted best the number of days until wilting, soil  
17 moisture, initial rosette area, initial leaf thickness, damage scores, relative leaf water loss,  
18 stomatal density and stomata length. A Gaussian distribution fitted better measures of desiccation  
19 rate and  $\delta^{13}\text{C}$ , a quasi-Poisson distribution was used for the photosynthesis activity and quasi  
20 binomial distribution for survival rate. We performed an ANOVA using Fisher's test (or Chi test  
21 for the binomial distribution of error) to identify the best model (P-value  $\leq 0.05$ ).

22 *Analysis of transcriptome variation during dry-down*

1 In the third dry-down experiment, three to four young leaves of ‘hal2.2’ and ‘Plech61.2a’,  
2 typical accessions of *A. halleri* and *A. lyrata*, respectively, were sampled from three  
3 replicate individuals at three time points: 1) before water withdrawal (soil moisture  
4 around 60%), 2) before wilting symptoms appeared (20% to 25% of soil moisture), and 3)  
5 leaves formed during the recovery phase (10-15 days after re-watering). These two  
6 accessions are representative of the phenotypic diversity observed in the dry-down  
7 experiment. RNA extraction was performed using the *PureLink*<sup>TM</sup> *RNA Ambion Mini Kit*  
8 (Thermofisher, Darmstadt, Germany). RNA quality and quantity were checked by Agilent  
9 2100 bioanalyzer (Agilent Technologies, Palo Alto, Calif.) using RNA nano chips. RNA  
10 of 18 leaf samples was sequenced on Illumina *HiSeq4000* by the Cologne Center for  
11 Genomics. Raw sequence data are available in the SRA database under the accession  
12 number: SRP150056.

13 We used the *fastx-tool-kits* from the *FastQC* package (V0.11.4) for raw sequence quality  
14 trimming and filtering following He et al. (2016). Low quality nucleotides were removed  
15 from the 3′-ends of the sequences using 20 as a phred score threshold (t) and 50 as  
16 minimum length (l). Sequences were reverse complemented using  
17 *fastx\_reverse\_complement* to cut the other end as we did for the 3′-end. Reads with less  
18 than 90% bases above the quality threshold and paired-end reads with a single valid end  
19 were discarded. We used the software package *STAR* with standard parameters (Dobin &  
20 Gingeras, 2015) to map trimmed and filtered reads to the *A. lyrata* reference genome V1  
21 (Hu *et al.*, 2011). Alternative transcripts were not considered because the current  
22 annotation of the *A. lyrata* genome does not describe alternative transcripts.  
23 Transcriptome sequencing yielded a total of 15 million read pairs per sample, with a read  
24 length of 75 bp. We used ‘*samtools view -q 10*’ to select the uniquely and high quality  
25 mapping reads with a probability of correct mapping of 90%.

1 On average, more than 80% of all reads were uniquely mapped and around 20% of  
2 unmapped and multiple mapped reads (Supplementary Fig. S1). R scripts were used to  
3 verify that reads covered the whole length of genes (and confirm that we had no sign of  
4 RNA degradation) and for counting the number of reads mapped to each. The *DESeq2*  
5 Bioconductor package from R (*Bioconductor version: Release 3.5*) was used to find genes  
6 that were differentially expressed (DE) between the different conditions (Love *et al.*,  
7 2014). We used the Wald test to compute P values and the following design: ~  
8 species/sample point, with two levels for the factor species (*A. halleri* and *A. lyrata*), and  
9 three levels for the factor sample point (leaves sampled at 60% of soil moisture, at 20-  
10 25% of soil moisture, and after recovery). Genes with a P value < 0.1 after Benjamini-  
11 Hochberg correction for false discovery rate (FDR) and log<sub>2</sub>-fold change ≤ -0.5 or ≥0.5  
12 were considered as DE.

### 13 *Gene ontology analysis*

14 Functional enrichments among DE genes were performed using *org.At.tair.db* data  
15 package of *Bioconductor* and the rank test of the *TopGO* package (Alexa &  
16 Rahnenfuhrer, 2010) was used to identify enriched gene ontology terms. The *elim*  
17 algorithm followed by a *Fisher* test were used with a cut-off of 0.01. As background all  
18 expressed genes were used (around 12220 genes). Enrichments were analyzed separately  
19 for: 1) all responsive genes, 2) down-regulated genes, and 3) up-regulated genes. The  
20 hyper-geometric test was used to test for the significance of gene overlap with a set of  
21 stress responsive genes (Matsui *et al.*, 2008).

## 22 RESULTS

23 *Interspecific differences in stomatal density and stomata length but not in water-use*  
24 *efficiency*

1 We evaluated whether, under well-watered conditions, constitutive physiological  
2 differences between *A. lyrata* and *A. halleri* can influence their potential to face limiting  
3 SWC. Variation in stomatal density on the leaf surface was explained by both within and  
4 between species variance (M1:  $F_{18, 469} = 36.15$ , P-value  $< 2e^{-16}$  within species;  $F_{1, 487}=256.59$ , P-value  $< 2.2e^{-16}$ , between species, Fig. 1A).

6 In *A. lyrata* stomatal density on the abaxial leaf surface was lower than in *A. halleri* (on average  
7 80 in *A. lyrata* and 150 stomata  $\text{mm}^2$  in *A. halleri*). By comparison, a recent and exhaustive  
8 analysis of stomatal density in *A. thaliana*, reported that stomatal density varies from 87 to 204  
9 stomata  $\text{mm}^2$  and it is negatively correlated with stomata length (Dittberner *et al.*, 2018). Stomata  
10 were larger in *A. lyrata* compared to *A. halleri* (M1: P-value  $< 2e^{-16}$ ) and the genetic variation in  
11 stomata length was significant both within and between these two species (M1:  $F_{16, 1370} = 53.68$ ,  
12 P-value  $< 2e^{-16}$  within species;  $F_{1, 1386}=3801.39$ , P-value  $< 2.2e^{-16}$ , between species). These  
13 differences however did not coincide with differences in carbon isotope discrimination ( $\delta^{13}\text{C}$ ), a  
14 commonly used proxy for water-use efficiency (WUE, Farquhar & Richards, 1984;  
15 Farquhar *et al.*, 1989; Lambers *et al.*, 1998; Dawson *et al.*, 2002). In non-stressed  
16 conditions, leaf  $\delta^{13}\text{C}$  showed significant genetic variation within species, but not between  
17 *A. halleri* and *A. lyrata* (-29.38 ‰ in *A. lyrata* and -29.37 ‰ in *A. halleri*, on average, M1:  $F_{16, 54} = 7.440$ , P-value =  $9.76e^{-09}$  within species, and  $F_{1, 70} = 0.005$ , P-value = 0.969, between  
19 species Fig. 1B).

## 20 *Wilting-related phenotypes revealed different drought response strategies*

21 The day of first appearance of wilting symptoms differed significantly between species in  
22 the first experiment, although accessions within species also differed (M1:  $F_{2, 214}=316.48$ ,  
23 P-value  $< 2.2e^{-16}$  for species, Fig. 3A,  $F_{48, 166} = 3.51$ , P-value =  $1.159e^{-09}$ , for accessions  
24 within species). The same result was observed in the second experiment (M1:  $F_{2, 201} =$   
25  $115.27$ , P-value  $< 2.2e^{-16}$ ,  $F_{33, 168} = 1.97$ , P-value = 0.002, Supplementary Fig. S2A).

1 Wilting manifested differently in the three species. In *A. thaliana*, leaves became pale and  
2 curled laterally, in *A. lyrata*, they curled apically, and in *A. halleri* leaves changed to  
3 darker green and collapsed (Fig. 2). On average, *A. halleri* accessions wilted around five  
4 to seven days after water withdrawal, *A. lyrata* accessions after 12 days and *A. thaliana*  
5 accessions after 18 days (Fig. 3A, Supplementary Table S4). Differences in the timing of  
6 wilting did not exactly coincide with SWC differences. At wilting, *A. halleri* and *A. lyrata*  
7 showed similar soil moisture (18-20%), whereas *A. thaliana* only wilted after soil  
8 moisture dropped below 10% (Fig. 3B, Supplementary Table S5). Again, these effects  
9 were consistent across experiments (Supplementary Fig. S2B). Significant differences  
10 were detected between species for soil moisture at wilting (M1:  $F_{2, 214} = 44.27$ , P-  
11 value =  $3.982e^{-16}$ ,  $F_{2, 201} = 181.60$ , P-value  $< 2.2e^{-16}$  for the first and second experiment  
12 respectively), and within species (M1:  $F_{48, 166} = 1.52$ , P-value = 0.020,  $F_{33, 168} = 2.23$ , P-  
13 value =  $1.07e^{-10}$  for the first and second experiment respectively).

#### 14 *A. halleri* plants exhaust SWC faster

15 To understand why *A. halleri* plants wilted around one week earlier than *A. lyrata* but at a  
16 similar soil moisture, we evaluated the rate of soil water loss for each species. We  
17 detected a significant interaction between species and time on soil moisture before wilting  
18 which showed that soil moisture decreased faster in pots where *A. halleri* accessions grew  
19 (Supplementary Fig. S3A, M3:  $F_{12, 1194} = 97.026$ , P-value  $< 2.2e^{-16}$ ). *A. halleri* thus  
20 consumed water significantly faster than *A. thaliana* and *A. lyrata*. Here again, this  
21 observation was replicated in the second biological experiment (M3:  $F_{4, 1224} = 761.07$ , P-  
22 value  $< 2.2e^{-16}$ , Supplementary Fig. S3B).

23 To examine the impact of plant size on the rate of soil water loss, we measured initial  
24 plant size and estimated the desiccation rate, defined as the rate of soil water loss per day

1 over the seven days following the water withdrawal in the second experiment of the dry-  
2 down experiment. *A. lyrata* and *A. halleri* accessions started with similar rosette size, but  
3 *A. thaliana* rosettes were initially larger (M2:  $F_{2, 173}=10.85$ , P-value=  $3.65e-05$ ,  
4 Supplementary Fig. S4A and Table S6). We detected a significant effect of the initial  
5 rosette area on the desiccation rate (M4  $F_{1, 170}=16.10$ , P-value= $8.97e^{-05}$ ) but no significant  
6 interaction between initial rosette area and species on desiccation rate (M4:  $F_{2, 170}=1.89$ ,  
7 P-value=0.15). Therefore, the consumption of soil water does not scale with plant size  
8 even though significant correlations between desiccation rate and initial rosette size were  
9 detected in *A. halleri*, less in *A. thaliana* but not in *A. lyrata* (Fig. 4A).

10 *A. lyrata* has the lowest relative loss of leaf water content before wilting

11 To estimate changes in leaf water content during the water-limited phase, we monitored  
12 leaf thickness (Lambers *et al.*, 1998) during soil dry-down phase in the second biological  
13 experiment. Initial leaf thickness was significantly higher in *A. lyrata* plants compared to  
14 *A. thaliana* and *A. halleri* (M1:  $F_{2, 140}=9.38$ , P-value= $3.30e^{-10}$ , Supplementary Fig. S4B  
15 and Table S7). We also detected a significant accessions effect within *A. lyrata* on the  
16 initial leaf thickness (M1,  $F_{33, 140}= 1.642$ , P-value=0.02548).

17 The significant interaction effect of soil desiccation rate and species (M4,  $F_{2, 818}=11.15$ , P-  
18 value= $1.66e-05$ ) on leaf thickness change over time revealed that the correlation between  
19 leaf thickness and soil desiccation rate was significant only for *A. halleri* (Fig. 4B,  
20 Supplementary Table S9). Furthermore, this analysis showed that *A. thaliana* leaves were  
21 able to hold higher amounts of water at lower soil moisture, compared to *A. lyrata* and *A.*  
22 *halleri* (Fig. 5), an indication that this species can effectively avoid the effects of drought  
23 by maintaining a comparatively higher water content in its leaves.

1 *A. thaliana* and *A. halleri*, however, lost similar amounts of water in the days preceding  
2 wilting. The relative loss of leaf water content before wilting was calculated by the ratio  
3 of leaf thickness two days before wilting by leaf thickness seven days before wilting (Fig.  
4 6). There was no significant accessions effect on the decrease of leaf thickness in the  
5 seven days before wilting (M1:  $F_{33, 138} = 0.9401$ , P-value=0.566) but the relative decrease  
6 before wilting was significantly higher in *A. thaliana* and *A. halleri*, compared to *A.*  
7 *lyrata* (M1:  $F_{2,171} = 6.628$ , P-value=  $5.00e^{-8}$ , Fig. 6, Supplementary Table S8). This pattern  
8 indicates that leaf water content in the days preceding the onset of wilting decreased more  
9 slowly in *A. lyrata* plants compared to *A. halleri* and *A. thaliana*. This suggests that  
10 wilting *A. lyrata* leaves experience lower loss of turgor.

#### 11 *High photosynthesis efficiency in wilted A. halleri and A. lyrata plants*

12 Photosynthesis efficiency was measured to evaluate the physiological status of plants at  
13 wilting. We used  $F_v : F_m$  ratio, as indicator for the potential capacity of non-cyclic  
14 electron flow in the photosynthetic light reaction. Despite the collapsed or rolled leaves  
15 observed at wilting in *A. halleri* and *A. lyrata*, respectively, both still had a high  
16 photosynthetic capacity: on average 83 and 90%, respectively. By contrast, the  
17 photosynthetic capacity had significantly dropped in wilted *A. thaliana* rosettes  
18 (Supplementary Fig. S5, Supplementary Table S10).

19

#### 20 *A. thaliana has the lowest survival rate*

21 Individual plants were re-watered two days after observing symptoms of wilting. Two to  
22 three weeks after re-watering, we scored survival. The proportion of survivors was  
23 significantly lower in *A. thaliana* compared to *A. halleri* and *A. lyrata* (9% in *A. thaliana*,  
24 85% in *A. halleri* and 84% in *A. lyrata*, Fig. 7, Supplementary Table S11). These  
25 differences were consistent across the two experiments (Supplementary Fig. S6).



1 To evaluate and compare the tolerance to wilting in *A. lyrata* and *A. halleri*, we ran an  
2 additional experiment examining whether extending the time from wilting to re-watering  
3 impacted survival. We detected a significant interaction effect of species and time to re-  
4 watering on survival (M4: Chi-Squared=234, DF= 1, DF residuals=252, P-value= $1.615e^{-04}$ ). We observed that 70-85% of *A. lyrata* plants survived 3 to 6 day-long wilting periods  
5 (Fig. 7). In comparison, this percentage dropped to 10% for *A. halleri* plants after five  
6 days of wilting and this was significantly different between species (Fig. 7, M2:  $F_{1, 26}=$   
7 20.681, P-value =  $2.44e^{-10}$ ). These results indicate that *A. lyrata* is more tolerant to wilting  
8 than its sister species *A. halleri*.

#### 10 *Efficient post-drought recovery in A. lyrata plants*

11 We further, assessed the tolerance to wilting by comparing damage exhibited by plants  
12 that survived two days of wilting in *A. lyrata* and *A. halleri*. The interaction between  
13 species and the damage score was found to be significant (M4,  $F_{3, 100}=2.96$ , P-value=  
14 0.035). In *A. lyrata*, about 70% of plants showed a very low degree of damage in leaves,  
15 whereas in *A. halleri*, only 30% of plants had low damage levels (M4, Fig. 8,  $F_{1, 25}=$   
16 24.063, P-value=  $4.761e^{-05}$ ). We did not include *A. thaliana* in the statistical analysis  
17 because only 10 out of 60 plants survived wilting. These results confirmed that *A. lyrata*  
18 tolerates soil dehydration and wilting better than *A. halleri*.

#### 19 *Transcriptome analysis confirms that A. halleri is more sensitive to low SWC*

20 *A. lyrata* and *A. halleri* both wilted at the same SWC but they differed in their survival  
21 following wilting. In order to gain insight into the molecular changes underpinning these  
22 differences, we performed a third dry-down experiment to collect leaf material in one  
23 representative accession of each of the sister species *A. halleri* and *A. lyrata* and  
24 examined the reaction to stress and recovery at the transcriptome level.

1 For each species, we compared transcript abundance at three time points during the dry-  
2 down experiment, i.e., at soil moisture 60%, soil moisture 20-25% and after recovery.  
3 The two species wilted at around 18% of soil moisture, as observed in the first two  
4 experiments, i.e., just below the soil moisture level at which leaf material was sampled.  
5 107 and 976 genes changed expression level at 20-25 vs. 60% soil moisture in *A. lyrata*  
6 and *A. halleri*, respectively (FDR 0.1; fold-change >1.6). Only three genes were  
7 responsive in both species to the decrease in SWC and this was a random overlap  
8 (*hypergeometric test*,  $P\text{-value}=0.993$ ).

9 After recovery, 275 *A. lyrata* genes and 20 *A. halleri* genes had changed expression level  
10 compared to 60% SWC (Table 1). Since both species had similarly high survival rates  
11 upon two days of wilting and because new undamaged leaves were sampled, these  
12 differences are not due to survival differences. We conclude that *A. halleri* displayed a  
13 comparatively sharpened response to low SWC, whereas the transcriptome of *A. lyrata*  
14 was comparatively more altered after recovery.

15 In a previous study, 2975 and 5445 genes were shown to be responsive to two and 10  
16 hours of dehydration in *A. thaliana* respectively (Matsui *et al.*, 2008). These drought-  
17 responsive genes were enriched in all sets of responsive genes identified in our study,  
18 either in *A. halleri* or in *A. lyrata*, at 20% soil moisture or after recovery (Table 2,  
19 *hypergeometric test*, maximum  $p \leq 8.77E-19$ ). This confirmed that our protocol  
20 succeeded in activating dehydration responsive genes. The list of significantly  
21 differentially expressed genes (including only AGI codes) is provided in Supplementary  
22 Table S12.

23 *Different GO categories are regulated in the two species*

1 Analysis of enrichment in Gene Ontology (GO) categories confirmed that different sets of  
2 genes were activated in the two species at each sampling stage. In *A. halleri* many genes  
3 involved in growth and development were down regulated when SWC decreased to 20-  
4 25%, (Table 3). These functions were not enriched in *A. lyrata* samples collected at the  
5 same time, instead genes involved in response to water deprivation and in ethylene and  
6 ABA signaling pathways were up regulated in *A. lyrata* after recovery (Table 3). Several  
7 GO terms appeared enriched, including isopentenyl diphosphate metabolic process,  
8 response to water deprivation, hyperosmotic salinity response, photosynthesis light  
9 reaction, response to chitin, photosystem II assembly, and maltose metabolic process  
10 (Table 3). They were also enriched among genes responding to mild drought stress in *A.*  
11 *thaliana*, although the direction of the gene expression change was not the same (Des  
12 Marais *et al.*, 2012). We further observed that genes with altered expression in *A. halleri*  
13 were enriched for genes functioning in plastid organization, pentose-phosphate shunt and  
14 photosystem II assembly. These three GO categories harbor an excess of *cis*-acting  
15 changes in the *A. halleri* lineage in response to dehydration stress (He *et al.*, 2016).

## 16 DISCUSSION

17 In our experimental design, we have used several accessions per species as we were  
18 interested in comparing the drought stress response of the three related species, while  
19 accounting for variation within species. To exclude the possibility that our results are  
20 influenced by a previous history of stress, we discarded sick or slow growing plants and  
21 studied the drought response of vigorously growing individuals. Our results showed  
22 genotypic differences in initial leaf thickness, initial stomatal density or initial rosette  
23 area, but the response to depletion in SWC did not reveal significant differences between

1 accessions. Differences in the response to water depletion therefore revealed fixed  
2 interspecific differences in avoidance and tolerance strategies to drought stress.

3 *Critical SWC does not reflect ecological differences between A. halleri and A. lyrata*

4 The sister species *A. lyrata* and *A. halleri* have separated recently and gene flow between  
5 the clades is still detectable (Novikova *et al.*, 2016). Yet, the two species display marked  
6 differences in ecological preference (Clauss & Koch, 2006). Ellenberg indices, which are  
7 reliable estimates of ecological preferences in Central Europe, show that *A. lyrata* is  
8 found in very dry areas with a soil humidity index (F) of 3, while *A. halleri* occurs in  
9 habitats where water is less limiting (F= 6) (Ellenberg & Leuschner, 2010). We were  
10 therefore surprised to observe that *A. halleri* and *A. lyrata* individuals wilted at identical  
11 SWC. In addition, contrary to our expectations, the ruderal species *A. thaliana* tolerated  
12 markedly lower SWC than its perennial relatives. Altogether, these observations show  
13 that the ecological preferences of *A. lyrata*, *A. halleri* and *A. thaliana* are not explained by  
14 the SWC threshold at which wilting symptoms appear.

15 *A. halleri* is directly exposed to stress caused by low SWC

16 We observed that *A. halleri* was the fastest to consume the water contained in the soil. In  
17 pots where *A. halleri* individuals grew, SWC decreased significantly faster  
18 (Supplementary Fig. S3). *A. halleri* also displayed the strongest correlation between plant  
19 size and the rate of water consumption and an accelerated decrease in leaf thickness  
20 preceding the onset of wilting (Fig. 4-6). At 25% soil water content, i.e. shortly before the  
21 appearance of the first wilting symptoms, the rate of decrease in leaf thickness accelerated  
22 in *A. halleri* compared to *A. lyrata*. This turning point coincided with a change in the  
23 expression levels of a larger number of genes belonging to stress-repressed GO categories  
24 such as leaf morphogenesis, cell proliferation, or photosynthesis. The down-regulation of

1 growth-related genes we observed, even before wilting symptoms appear, indicates that  
2 the plant experiences direct stress at the cellular level as SWC approaches the limiting  
3 threshold. In agreement with the high levels of stress it experienced, *A. halleri* also  
4 showed a comparatively higher damage when survivors resumed growth after stress.

5 Although less tolerant to wilting than *A. lyrata*, *A. halleri* did display some level of tolerance,  
6 because it was comparatively more tolerant than *A. thaliana* as it did survive two days of wilting.  
7 Yet, of the three species, *A. halleri* clearly displayed the weakest levels of drought avoidance,  
8 being almost directly exposed to stress caused by decreasing SWC. *A. halleri* thrives in more  
9 competitive habitats than its relatives (Clauss & Koch, 2016; Stein *et al.*, 2017), and  
10 competitive ability generally evolves in a trade-off with stress tolerance in plant species  
11 (Grime *et al.*, 1977; Sreenivasulu *et al.*, 2012). It is therefore possible that improved  
12 competitive ability was selected in this lineage at the expense of tolerance and avoidance  
13 mechanisms. Such evolutionary scenarios have been documented in several grass species  
14 (Fernández & Reynolds, 2000; Liancourt *et al.*, 2005; Sugiyama, 2006). Interestingly, we  
15 have previously observed that an excess of *cis*-acting changes up-regulating gene  
16 expression after one hour of dehydration had accumulated in the *A. halleri* lineage in  
17 several functions that the more tolerant species *A. lyrata* down-regulates during recovery  
18 (He *et al.*, 2016). It is therefore possible that the decrease in tolerance and avoidance of  
19 drought stress was advantageous in the context of selection for increased competitive  
20 ability.

#### 21 *A. lyrata* displays avoidance and tolerance responses to soil dehydration

22 By comparison with *A. halleri*, *A. lyrata* displayed a more parsimonious use of water. *A.*  
23 *lyrata* plants displayed both a lower rate of water consumption and markedly lower  
24 damage levels after resuming growth. In addition, we observed that *A. lyrata* plants had  
25 the ability to survive longer durations of wilting than both *A. halleri* and *A. thaliana* (Fig.

1 7). It is also the only species that showed adaxial leaf rolling, a phenotype favoring  
2 drought avoidance in plants (Oppenheimer, 1960; O'Toole & Moya, 1978; Jones, 1979;  
3 Clarke, 1986). Leaf rolling indeed reduces transpiration rate by reducing the effective leaf  
4 area. Altogether, this indicates that exposure to limiting SWC is comparably less  
5 damaging in *A. lyrata*.

6 The transcriptome response to decreasing SWC corroborated this observation, by  
7 documenting lower levels of cellular stress in *A. lyrata* immediately before wilting,  
8 compared to *A. halleri*. Only a few genes changed expression before wilting in *A. lyrata*.

9 We further observed that among genes down-regulated after recovery, the most enriched  
10 GO category is 'pentose-phosphate shunt' ( $p < 5 \cdot 10^{-5}$ ), a metabolic pathway involved in  
11 the scavenging of reactive oxygen intermediates that is strongly activated by abiotic stress  
12 (Mittler, 2002; Kruger & von Schaewen, 2003). Several additional GO functions  
13 associated with drought stress, such as 'hyperosmotic salinity response', 'response to  
14 water deprivation', 'abscisic acid-activated signaling pathway', 'ethylene-activated  
15 signaling pathway', and 'response to chitin' were up-regulated in *A. lyrata* during  
16 recovery. The latter functions seem to have a dynamic role in drought stress. In *A.*  
17 *thaliana*, they were up-regulated by severe fast wilting (Matsui et al. 2008) but down-  
18 regulated by mild stress (Des Marais et al., 2012). Their up-regulation after recovery in *A.*  
19 *lyrata*, in the absence of obvious stress, shows that the reaction of this species to lowering  
20 SWC contrasts not only with that displayed by *A. halleri* but also with that known for *A.*  
21 *thaliana*. The absence of a strong modification of the expression of drought-stress  
22 responsive genes at SWC approaching critical levels in *A. lyrata*, combined with a high  
23 survival rate, further indicates that this species has the ability to i) minimize its exposure  
24 to the stressful consequences of low soil water content and ii) maximize its ability to  
25 survive severe dehydration. It thus deploys both avoidance and tolerance strategies.

1 Whether the lower stomata density observed in *A. lyrata* (Fig. 1a) contributes to its improved  
2 ability to cope with limiting water availability is difficult to evaluate with our data. Indeed,  
3 increased stomata density has been associated with decreased WUE both within and between  
4 species (Carlson, Adams, & Holsinger, 2016; Muchow & Sinclair, 1989; Reich, 1984;  
5 Anderson & Briske, 1990; Pearce, Millard, Bray, & Rood, 2006; Doheny-Adams *et al.*, 2012;  
6 Liu *et al.*, 2012). Yet, in monkey flowers and in *Arabidopsis thaliana*, lower stomatal density was  
7 associated with higher WUE (Wu *et al.*, 2010, Dittberner *et al.* 2018). The consequences of  
8 modification in stomata density and size on the plant's ability to cope with limiting water supply  
9 are, in fact, not easily predictable. First, water use efficiency can increase as a result of either  
10 increased stomata density or increased stomata size because larger stomata close more slowly  
11 (Raven, 2014). Second, the two traits generally correlate negatively (Dittberner *et al.* 2018,  
12 Hetherington and Woodward, 2003). Third, parameters independent of stomata patterning such as  
13 photosynthetic ability can also contribute to variation in WUE, as reported recently in *A. thaliana*  
14 (Dittberner *et al.* 2018, Farquhar *et al.* 1989). Fourth, stomata patterning changes in *A. lyrata*  
15 plants when exposed to limiting water supply (Paccard *et al.* 2014). Our data reveals that in well-  
16 watered greenhouse conditions *A. lyrata* did not show a globally higher WUE than *A. halleri* (Fig.  
17 1b), despite significant differences in stomata density and size. Future work will have to  
18 investigate the impact of modifications in stomata patterning on interspecific differences in  
19 tolerance and avoidance in the face of limiting SWC.

20 *High levels of stress avoidance associate with low tolerance to drought in A. thaliana*

21 In annual species, seasonal drought can be a potent source of selection for accelerated  
22 flowering and faster cycling (Franks *et al.*, 2007; Fitter & Fitter, 2002). *A. thaliana* was  
23 also expected to maximize its resource investment into growth and reproduction and show  
24 a lower level of stress tolerance compared to its perennial relatives. Here, we focused on  
25 late flowering *A. thaliana* accessions that in the conditions we imposed could not  
26 accelerate their development to escape drought. Thus, we cannot conclude on the relative

1 investment of *Arabidopsis* species in escape strategies, but our experimental set up  
2 allowed an interspecific assessment of avoidance and tolerance to wilting. Contrary to  
3 expectations, we observed that our sample of accessions could persist at lower SWC than  
4 both of their perennial relatives, *A. lyrata* and *A. halleri* (Fig. 3A). In addition, the  
5 delayed decrease in leaf thickness observed in *A. thaliana* shows that, compared to the  
6 other two species, it is able to maintain its leaf water content at lower SWC (Fig. 5). This  
7 therefore suggests that the annual species *A. thaliana* also employs stress avoidance  
8 mechanisms. The ability of this annual species to escape stress by accelerating  
9 development has therefore not led to the loss of mechanisms favoring the maintenance of  
10 internal water potentials. Indeed, the production of proline, which is both an  
11 osmoprotectant and an anti-oxidant,  $\delta^{13}\text{C}$ , a proxy measuring WUE, as well as the  
12 maintenance of photosynthesis during terminal drought have been documented to play a  
13 role in local adaptation in this species (Verslues & Juenger, 2011; Kesari *et al.*, 2012;  
14 Exposito-Alonso *et al.*, 2017; Dittberner *et al.*, 2018).

15 *A. thaliana*, however, was not able to tolerate wilting. We observed a marked decrease in  
16 the photosynthetic capacity at wilting in this species, as previously reported in several  
17 species such as *Hordeum vulgare*, *Hibiscus rosa-sinensis*, and *Andropogon gerardii*  
18 (Golding & Johnson, 2003; Muñoz & Quiles, 2013; Maricle *et al.*, 2017). In addition, *A.*  
19 *thaliana* did not survive after two days of wilting, although its perennial relatives  
20 displayed markedly higher survival rates. The annual species therefore appears to have  
21 evolved lower levels of tolerance to wilting.

22 We detected no significant variation for the response to decreasing SWC between the *A.*  
23 *thaliana* accessions included in this study, however, we cannot conclude that the  
24 avoidance capacity and the low tolerance to wilting we observed is fixed in the species.  
25 The *A. thaliana* population we used consisted of a set of late-flowering accessions from



1 Spain that could not accelerate flowering fast enough to escape stress. This set of  
2 accessions is not necessarily representative of the whole species. *A. thaliana* is broadly  
3 distributed and its accessions can form ecotypes with markedly different levels of stress  
4 resistance (May *et al.*, 2017). Furthermore, two recent studies indicate that Swedish  
5 accessions have a comparatively greater capacity to face dry conditions, probably because  
6 the short favorable season of Scandinavia constrains them to face limiting water  
7 availability when it strikes (Exposito-Alonso *et al.*, 2017, Dittberner *et al.*, 2018).

8 This study documents the contrasting reactions deployed by *Arabidopsis* species in  
9 response to lowering SWC. In the face of their respective ecologies, these diversified  
10 reactions likely reflect the priority shifts imposed by divergent ecologies and life cycles.  
11 Future studies aiming at dissecting the genetic and molecular underpinning of these  
12 differences promise to teach us much about the processes accompanying ecological  
13 diversification in plant species.

14

15

16

17

18

19

20

21

1 **Table 1:** Number of significantly differentially expressed genes in *Arabidopsis halleri*  
2 and *A. lyrata* during the dry-down experiment at 20% of soil moisture or after recovery  
3 compared to expression before stress (60% of soil moisture).

|                                  |      | <i>A. halleri</i> | <i>A. lyrata</i> |
|----------------------------------|------|-------------------|------------------|
| 20% vs 60% of soil moisture      | Up   | 253               | 36               |
|                                  | Down | 676               | 71               |
| recovery vs 60% of soil moisture | Up   | 8                 | 111              |
|                                  | Down | 12                | 156              |

4

5

6

7

8

9

10

11

12

13

14

15

1 **Table 2:** Percentage of differentially expressed genes that overlap with differentially  
 2 expressed genes reported in Matsui *et al.*, (2008) after 2 h (dh2) and 10 h (dh10) of  
 3 dehydration stress (N.S.: not significant). The random expectation of overlap % is  
 4 indicated in bold on the top row.

|                                                                   |                      | <b>dh2</b>                | <b>dh10</b>               |
|-------------------------------------------------------------------|----------------------|---------------------------|---------------------------|
|                                                                   |                      | <b>expected:</b>          | <b>expected:</b>          |
|                                                                   |                      | <b>up 7.39%</b>           | <b>up 10%</b>             |
|                                                                   |                      | <b>down 10%</b>           | <b>down 7.5%</b>          |
| <b><i>A. halleri</i> 20% vs<br/>60% of soil<br/>moisture</b>      | Up (127 ATG genes)   | 27.5% <i>P</i> = 1.09E-12 | 47.2% <i>P</i> = 7.82E-28 |
|                                                                   | Down (385 ATG genes) | 12.4% <i>P</i> = 6.03E-23 | 36.3% <i>P</i> = 1.17E-59 |
| <b><i>A. halleri</i> recovery<br/>vs 60% of soil<br/>moisture</b> | Up (6 ATG genes)     | 0 N.S.                    | 0 N.S.                    |
|                                                                   | Down (7 ATG genes)   | 0 N.S.                    | 28.5% <i>P</i> = 1.20E-02 |
| <b><i>A. lyrata</i> 20% vs<br/>60% of soil<br/>moisture</b>       | Up (15 ATG genes)    | 40% <i>P</i> = 4.52E-05   | 46.6% <i>P</i> = 3.34E-05 |
|                                                                   | Down (37 ATG genes)  | 5.4% N. S.                | 18.9% <i>P</i> = 5.7E-03  |
| <b><i>A. lyrata</i> recovery<br/>vs 60% of soil<br/>moisture</b>  | Up (61 ATG genes)    | 63.9% <i>P</i> = 1.06E-30 | 54% <i>P</i> = 8.77E-19   |
|                                                                   | Down (90 ATG genes)  | 11.1% N. S.               | 32.2% <i>P</i> =1.63E-12  |

5

6

7

- 1 **Table 3:** GO Categories Showing a Significant Enrichment ( $P < 0.01$ ) among
- 2 differentially expressed genes between 20% and 60% of soil moisture and between
- 3 recovery and 60% of soil moisture for *Arabidopsis halleri* and *A. lyrata*.

|                                                               | GO.ID                                     | Term                                   | pvalue   | Gene regulation |
|---------------------------------------------------------------|-------------------------------------------|----------------------------------------|----------|-----------------|
| <i>A. halleri</i><br>20% vs<br>60% of<br>soil<br>moisture     | GO:0015979                                | photosynthesis                         | 0.0011   | down            |
|                                                               | GO:1901576                                | organic substance biosynthetic process | 0.0013   | down            |
|                                                               | GO:0044711                                | single-organism biosynthetic process   | 0.0014   | down            |
|                                                               | GO:0051188                                | cofactor biosynthetic process          | 0.0023   | down            |
|                                                               | GO:0008283                                | cell proliferation                     | 0.0035   | down            |
|                                                               | GO:0006098                                | pentose-phosphate shunt                | 0.0041   | down            |
|                                                               | GO:0009965                                | leaf morphogenesis                     | 0.0048   | down            |
|                                                               | GO:0009657                                | plastid organization                   | 0.0059   | down            |
|                                                               | GO:0042254                                | ribosome biogenesis                    | 0.0059   | down            |
|                                                               | GO:0006084                                | acetyl-CoA metabolic process           | 0.0064   | down            |
| <i>A. lyrata</i><br>recovery<br>vs 60% of<br>soil<br>moisture | GO:0006098                                | pentose-phosphate shunt                | 0.000043 | down            |
|                                                               | GO:0010200                                | response to chitin                     | 0.000051 | up              |
|                                                               | GO:0010207                                | photosystem II assembly                | 0.00007  | down            |
|                                                               | GO:0000023                                | maltose metabolic process              | 0.00017  | down            |
|                                                               | <u>GO:0009873</u>                         | ethylene-activated signaling pathway   | 0.0002   | up              |
|                                                               | GO:0019252                                | starch biosynthetic process            | 0.00039  | down            |
|                                                               | GO:0009612                                | response to mechanical stimulus        | 0.0015   | up              |
|                                                               | GO:0009414                                | response to water deprivation          | 0.0029   | up              |
|                                                               | GO:0042538                                | hyperosmotic salinity response         | 0.0043   | up              |
|                                                               | GO:0051707                                | response to other organism             | 0.005    | up              |
|                                                               | GO:0009657                                | plastid organization                   | 0.00571  | down            |
|                                                               | GO:0050790                                | regulation of catalytic activity       | 0.00763  | down            |
|                                                               | GO:0042742                                | defense response to bacterium          | 0.00784  | down            |
| GO:0009738                                                    | abscisic acid-activated signaling pathway | 0.0086                                 | up       |                 |

4

5

6

## 1 FUNDING INFORMATION

2 This work was supported by the German Research Foundation ‘Deutsche  
3 Forschungsgemeinschaft DFG [DFG priority program 1529 ‘ADAPTOMICS’] and by the  
4 Cluster of Excellence on Plant Sciences [EXC 1028].

## 5 ACKNOWLEDGEMENTS

6 We thank Agustín Arce, Kim Steige, Ulrike Goebel, Hannes Dittberner, Veronica Preite,  
7 Julia Plewka, Nina Grisard, Martin Rippin, and Kirsten Bell for their technical support.  
8 Ute Krämer for providing *A. halleri* accessions, commenting on experimental set up, and  
9 commenting on the manuscript draft. The Cologne Center for Genomics performed  
10 HiSeq4000 RNA sequencing. The phenotypic data is available as supplementary  
11 information (Suppl. Table 13).

## 12 LITERATURE CITED

- 13 **Alexa A, Rahnenfuhrer J. 2010.** topGO: *enrichment analysis for Gene Ontology*. R  
14 package version 2.20.0.
- 15 **Anderson VJ, Briske DD. 1990.** Stomatal Distribution, Density and Conductance of  
16 Three Perennial Grasses Native to the Southern True Prairie of Texas. *The American*  
17 *Naturalist*, 123(1), 152–159.
- 18 **Becher M, Talke IN, Krall L, Krämer U. 2004.** Cross-species microarray transcript  
19 profiling reveals high constitutive expression of metal homeostasis genes in shoots of the  
20 zinc hyperaccumulator *Arabidopsis halleri*. *The Plant Journal* **37**: 251-268.

- 1 **Bechtold U, Penfold CA, Jenkins DJ, et al. 2016.** Time-series transcriptomics reveals  
2 that AGAMOUS-LIKE22 affects primary metabolism and developmental processes in  
3 droughtstressed Arabidopsis. *Plant Cell* **28**: 345-366.
- 4 **Bewley JD. 1997.** Seed Germination and Dormancy. *Plant Cell* **9**: 1055-66.
- 5 **Bohnert HJ, Nelson DE, Jensen RG. 1995.** Adaptations to environmental stresses.  
6 *Plant Cell* **7**: 1099-1111.
- 7 **Boyer JS. 1982.** Plant productivity and environment. *Science* **218**: 443-448.
- 8 **Bray EA, Bailey-Serres J, Weretilnyk E. 2000.** “Responses to abiotic stresses,” In:  
9 Biochemistry and Molecular Biology of Plants (B. B. Buchanan, W. Gruissem, and R. L.  
10 Jones, eds). American Society of Plant Physiologists, Rockville, Md. 1158-1203.
- 11 **Bray EA. 1997.** Plant responses to water deficit. *Trends in plant science* **2**: 48-54.
- 12 **Bray EA. 2004.** Genes commonly regulated by water-deficit stress in *Arabidopsis*  
13 *thaliana*. *Journal of Experimental Botany*, Vol. 55, No. 407.
- 14 **Carlson JE, Adams CA, Holsinger, KE. 2016.** Intraspecific variation in stomatal traits, leaf traits  
15 and physiology reflects adaptation along aridity gradients in a South African shrub. *Annals of*  
16 *Botany*, 117(1), 195–207.
- 17 **Clarke JM. 1986.** Effect of leaf rolling on leaf water loss in *Trilicam* spp. *Canadian*  
18 *Journal of Plant Science* **66**: 885-891.
- 19 **Clauss MJ, Koch MA. 2006.** Poorly known relatives of *Arabidopsis thaliana*. *TRENDS*  
20 *in Plant Science* **9**:449-59.
- 21 **Close TJ. 1996.** Dehydrins: Emergence of a biochemical role of a family of plant  
22 dehydration proteins. *Physiologia Plantarum* **97**: 795-803.

- 1 **Dawson TE, Mambelli S, Plamboeck AH, Templer PH, Tu KP. 2002.** Stable isotopes  
2 in plant ecology. *Annual Review of Ecology, Evolution, and Systematics* **33**: 507-559.
- 3 **Des Marais DL, McKay JK, Richards JH, Saunak S, Tierney W, Juenger TE. 2012.**  
4 Physiological Genomics of Response to Soil Drying in Diverse Arabidopsis Accessions.  
5 *The Plant Cell* **24**: 893–914.
- 6 **Dittberner H, Korte A, Mettler-Altmann T, Weber APM, Monroe G, de Meaux J.**  
7 **2018.** Natural variation in stomata size contributes to the local adaptation of water-use  
8 efficiency in *Arabidopsis thaliana*. *Molecular Ecology*, doi: 10.1101/253021.
- 9 **Dobin A, Gingeras TR. 2016.** Mapping RNA-seq Reads with STAR. *Current Protocols*  
10 *in Bioinformatics* **51**: 11.14.1-11.14.19.
- 11 **Doheny-Adams T, Hunt L, Franks PJ, Beerling DJ, Gray JE. 2012.** Genetic  
12 manipulation of stomatal density influences stomatal size, plant growth and tolerance to  
13 restricted water supply across a growth carbon dioxide gradient. *Philosophical*  
14 *Transactions of the Royal Society B: Biological Sciences* **367**: 547-555.
- 15 **Durvasula A, Fulgione A, Gutaker RM, et al. 2017.** African genomes illuminate the  
16 early history and transition to selfing in *Arabidopsis thaliana*. *Proceedings of the*  
17 *National Academy of Sciences of the United States of America* **114**:5213-5218.
- 18 **Ellenberg H, Leuschner C. 2010.** *In the additional material of* Vegetation Mitteleuropas  
19 mit den Alpen. Ed.6.
- 20 **Exposito-Alonso M, Vasseur F, Ding W, Wang G, Burbano HA, Weigel D. 2017.**  
21 Genomic basis and evolutionary potential for extreme drought adaptation in *Arabidopsis*  
22 *thaliana*. . *Nature Ecology and Evolution* **2**: 352–358 (2018).

- 1 **Fang Y, Xiong L. 2015.** General mechanisms of drought response and their application  
2 in drought resistance improvement in plants. *Cellular and Molecular Life Sciences*. **72**:  
3 673-689.
- 4 **Farooq M, Wahid A, Kobayashi N, Fujita D, Basra SMA. 2009.** Plant drought stress:  
5 effects, mechanisms and management. *Agronomy for Sustainable Development, Springer*  
6 *Verlag (Germany)*, **29** (1): 185-212.
- 7 **Farquhar GD, Ehleringer J, Hubick K. 1989.** Carbon isotope discrimination and  
8 photosynthesis. *Annual Review of Plant Physiology and Plant Molecular Biology* **40**:  
9 503-537.
- 10 **Farquhar GD, Richards A. 1984.** Isotopic Composition of Plant Carbon Correlates with  
11 Water-use Efficiency of Wheat Genotypes. *Australian Journal of Plant Physiology* **11**:  
12 539–552.
- 13 **Fernández TJ, Reynolds JF. 2000.** Potential growth and drought tolerance of eight  
14 desert grasses: lack of a trade-off? *Oecologia* **123**: 90-98
- 15 **Fitter AH, Fitter RSR. 2002.** Rapid changes in flowering time in British plants. *Science*  
16 **296**: 1689-1691.
- 17 **Fox GA. 1990.** Drought and the evolution of flowering time in desert annuals. *American*  
18 *Journal of Botany* **77**: 1508-1518.
- 19 **Franks SJ, Sim S, Weis AE. 2007.** Rapid evolution of flowering time by annual plant in  
20 response to a climate fluctuation. *Proceedings of the National Academy of Sciences, USA*  
21 **104**: 1278-1282.
- 22 **Fukai S, Cooper M. 1995.** Development of drought-resistant cultivars using  
23 physiomorphological traits in rice. *Field Crops Research* **40**: 67-86.



- 1 **Genty B, Briantais JM, Baker NR. 1989.** The relationship between the quantum yield  
2 of photosynthetic electron transport and quenching of chlorophyll fluorescence.  
3 *Biochimica et Biophysica Acta* **990**: 87-92.
- 4 **Golding AJ, Johnson GN. 2003.** Down-regulation of linear and activation of cyclic  
5 electron transport during drought. *Planta* **218**: 107–114.
- 6 **Golovina EA, Wolkers WF, Hoekstra FA. 1997.** Long-term stability of protein  
7 secondary structure in dry seeds. *Comparative Biochemistry and Physiology* **117A**: 343-  
8 348.
- 9 **Gowik U, Brautigam A, Weber KL, Weber APM, Westhoff P. 2011.** Evolution of C-4  
10 Photosynthesis in the Genus *Flaveria*: How Many and Which Genes Does It Take to  
11 Make C-4? *Plant Cell* **23** 6:2087-2105.
- 12 **Grime JP. 1977.** Evidence for the Existence of Three Primary Strategies in Plants and Its  
13 Relevance to Ecological and Evolutionary. *The American Naturalist* Vol. 111. NO. 982.
- 14 **Harb A, Krishnan A, Ambavaram Madana MR, Pereira A. 2010.** Molecular and  
15 Physiological Analysis of Drought Stress in *Arabidopsis* Reveals Early Responses  
16 Leading to Acclimation in Plant Growth. *Plant Physiology* **154**: 1254-1271.
- 17 **He F, Arce AL, Schmitz G, Koornneef M, Novikova P, Beyer A, de Meaux J. 2016.**  
18 The Footprint of Polygenic Adaptation on Stress-Responsive Cis-Regulatory Divergence  
19 in the *Arabidopsis* Genus. *Molecular Biology and Evolution* **8**: 2088-101. doi:  
20 10.1093/molbev/msw096.
- 21 **Hoffmann AA, Sgrò CM. 2011.** Climate change and evolutionary adaptation. *Nature*  
22 479 (Vol. 470).

- 1 **Hoffmann MH. 2005.** Evolution of the realized climatic niche in the genus *Arabidopsis*  
2 (Brassicaceae). *Evolution* **59**:1425-1436.
- 3 **Hu H, Xiong L. 2014.** Genetic engineering and breeding of drought-resistant crops.  
4 *Annual Review of Plant Biology* **65**: 715-741.
- 5 **Hu TT, Pattyn P, Bakker E, et al. 2011.** The *Arabidopsis lyrata* genome sequence and  
6 the basis of rapid genome size change. *Nature Genetics* **43**: 476-481.
- 7 **Ingram J, Bartels D. 1996.** The Molecular Basis of Dehydration Tolerance in Plants.  
8 *Annual Review of Plant Physiology and Plant Molecular Biology* **47**: 377-403.
- 9 **Iuchi S, Kobayashi M, Taji T, et al. 2001.** Regulation of drought tolerance by gene  
10 manipulation of 9-*cis*-epoxycarotenoid dioxygenase, a key enzyme in abscisic acid  
11 biosynthesis in *Arabidopsis*. *The Plant Journal* **27**: 325–333.
- 12 **Jones HG.1979.** Visual estimation of plant water status in cereals. *Journal of*  
13 *Agricultural Science* **92**: 83-89.
- 14 **Juenger TE. 2013.** Natural variation and genetic constraints on drought tolerance.  
15 *Current Opinion in Plant Biology* **16**: 274-281.
- 16 **Kermode A. 1997.** Approaches to elucidate the basis of desiccation-tolerance in seeds.  
17 *Seed Science Research* **7** (2) : 75-95.
- 18 **Kesari R, Lasky JR, Villamor JG, Des Marais DL, et al. 2012.** Intron-mediated  
19 alternative splicing of *Arabidopsis* P5CS1 and its association with natural variation in  
20 proline and climate adaptation. *Proceedings of the National Academy of Sciences of the*  
21 *United States of America* **109** (23): 9197-9202.
- 22 **Kooyers NJ. 2015.** The evolution of drought escape and avoidance in natural herbaceous  
23 populations. *Plant Science* **234**: 155-162.

- 1 **Krämer U, Clemens S. 2006.** Functions and homeostasis of zinc, copper and nickel in  
2 plants. In: Tamas MJ, Martinoia E, eds. Molecular biology of metal homeostasis and  
3 detoxification. *Heidelberg, Germany: Springer-Verlag* 215-271.
- 4 **Kronholm I, Picó FX, Alonso-Blanco C, Goudet J, de Meaux JD. 2012.** Genetic basis  
5 of adaptation in *Arabidopsis thaliana*: local adaptation at the seed dormancy QTL DOG1.  
6 *Evolution* **66**: 2287-2302.
- 7 **Kruger NJ, von Schaewen A. 2003.** The oxidative pentose phosphate pathway: structure  
8 and organization. *Current Opinion in Plant Biology* **6**: 236-246.
- 9 **Levitt J. 1980.** Responses of plants to environmental stresses. 2<sup>nd</sup> ed. *New York:*  
10 *Academic Press.*
- 11 **Liancourt P, Callaway RM, Michalet R. 2005.** Stress tolerance and competitive-  
12 response ability determine the outcome of biotic interactions. *Ecology* **86**: 1611-1618.
- 13 **Liu J, Zhang F, Zhou J, Chen F, Wang B, Xie X. 2012.** Phytochrome B control of total  
14 leaf area and stomatal density affects drought tolerance in rice. *Plant Molecular Biology*  
15 **78**: 289-300.
- 16 **Lovell JT, Juenger TE, Michaels SD, et al. 2013.** Pleiotropy of FRIGIDA enhances the  
17 potential for multivariate adaptation. *Proceedings of the Royal Society B: Biological*  
18 *Sciences* **280**: 2013-1043.
- 19 **Lovell JT, Mullen JL, Lowry DB, et al. 2015.** Exploiting Differential Gene Expression  
20 and Epistasis to Discover Candidate Genes for Drought-Associated QTLs in *Arabidopsis*  
21 *thaliana*. *The Plant Cell* **27**: 969-983.

- 1 **Ludlow MM. 1989.** Strategies of response to water stress. In: Kreeb, K.H., Richter, H.  
2 and Hinckley, T.M., Eds., *Structural and Functional Responses to Environmental*  
3 *Stresses*, SPB Academic Publishing, The Hague, 269-281.
- 4 **Maricle BR, Caudle KL, Lindsey KJ, Baer SG, Johnson LC. 2017.** Effects of Extreme  
5 Drought on Photosynthesis and Water Potential of *Andropogon gerardii* (Big Bluestem)  
6 Ecotypes in Common Gardens Across Kansas. *Transactions of the Kansas Academy of*  
7 *Science* **120**: 1-16.
- 8 **Matsui A, Ishida J, Morosawa T, Mochizuki Y, Kaminuma E, et al. 2008.**  
9 Arabidopsis Transcriptome Analysis under Drought, Cold, High-Salinity and ABA  
10 Treatment Conditions using a Tiling Array. *Plant and Cell Physiology* **49** (8): 1135-1149.
- 11 **Maxwell K, Johnson GN. 2000.** Chlorophyll fluorescence-a practical guide. *Journal of*  
12 *Experimental Botany*, **51** (345): 659-668.
- 13 **May RL, Warner S, Wingler A. 2017.** Classification of intra-specific variation in plant  
14 functional strategies reveals adaptation to climate. *Annals of Botany* **119**: 1343–1352.
- 15 **McKay JK, Richards JH, Mitchell-Olds T. 2003.** Genetics of drought adaptation in  
16 *Arabidopsis thaliana*: I. Pleiotropy contributes to genetic correlations among ecological  
17 traits. *Molecular Ecology* **12**: 1137-1151.
- 18 **Mitchell-Olds T. 2001.** *Arabidopsis thaliana* and its wild relatives: a model system for  
19 ecology and evolution. *TRENDS in Ecology & Evolution* Vol.16 No.12.
- 20 **Mittler R. 2002.** Oxidative stress, antioxidants and stress tolerance. *TRENDS in Plant*  
21 *Science* Vol.7 No.9.

- 1 **Muchow RC, & Sinclair TR. 1989.** Epidermal conductance, stomatal density and  
2 stomatal size among genotypes of *Sorghum bicolor* (L.) Moench. *Plant, Cell &*  
3 *Environment*, 12(4), 425–431.
- 4 **Munemasa S, Hauser F, Park J, Waadt R, Brandt B, Schroeder JI. 2015.**  
5 Mechanisms of abscisic acid-mediated control of stomatal aperture. *Current Opinion in*  
6 *Plant Biology* 28: 154–162.
- 7 **Muñoz R, Quiles M J. 2013.** Water Deficit and Heat Affect the Tolerance to High  
8 Illumination in Hibiscus Plants. *International Journal of Molecular Sciences* 14: 5432-  
9 5444.
- 10 **Nakashima K, Ito Y, Yamaguchi-Shinozaki K. 2009. Transcriptional** Regulatory  
11 Networks in Response to Abiotic Stresses in Arabidopsis and Grasses. *Plant Physiology*  
12 149:88-95
- 13 **Novikova PY, Hohmann N, Nizhynska V, et al. 2016.** Sequencing of the genus  
14 Arabidopsis identifies a complex history of nonbifurcating speciation and abundant trans-  
15 specific polymorphism. *Nature Genetics* 48: 077–1082.
- 16 **O’Toole JC, Moya TB. 1978.** Genotypic variation in maintenance of leaf water potential  
17 in rice. *Crop Science* 18: 873-876.
- 18 **Oppenheimer HR. 1960.** Adaptation to drought: Xerophytism. In: Plant water  
19 relationships in arid and semi-arid conditions. United Nations Educational, Scientific and  
20 Cultural Organization, Place de Fontenoy, Paris-7e, 105-138.
- 21 **Osakabe Y, Yamaguchi-Shinozaki K, Shinozaki K, Tran LSP. 2014.** ABA control of  
22 plant macro-element membrane transport systems in response to water deficit and high  
23 salinity. *New Phytologist* 202: 35-49.

- 1 **Paccard A, Fruleux A, Willi Y. 2014.** Latitudinal trait variation and responses to  
2 drought in *Arabidopsis lyrata*. *Oecologia* **175**: 577-587.
- 3 **Pauwels M, Saumitou-Laprade P, Holl AC, Petit D, Bonnin I. 2005.** Multiple origin of  
4 metallicolous populations of the pseudometallophyte *Arabidopsis halleri* (Brassicaceae)  
5 in central Europe: the cpDNA testimony. *Molecular Ecology* **14**: 4403-4414.
- 6 Pearce DW, Millard S, Bray DF, Rood SB. 2006. Stomatal characteristics of riparian  
7 poplar species in a semi-arid environment. *Tree Physiology*, 26(2), 211–218.
- 8 **Price AH, Cairns JE, Horton P, Jones HG, Griffiths H. 2002.** Linking drought-  
9 resistance mechanisms to drought avoidance in upland rice using a QTL approach:  
10 progress and new opportunities to integrate stomatal and mesophyll responses. *Journal of*  
11 *Experimental Botany* **53**: 9891004
- 12 **Reddy AR, Chaitanya KV, Vivekanandan M. 2004.** Drought-induced responses of  
13 photosynthesis and antioxidant metabolism in higher plants. *Journal of plant physiology*  
14 **161**: 1189-1202.
- 15 **Reich PB. 1984.** Leaf Stomatal Density and Diffusive Conductance in Three  
16 Amphistomatous Hybrid Poplar Cultivars. *New Phytologist*, 98(2), 231–239.
- 17 **Ross-Ibarra J, Wright SI, Foxe JP, et al. 2008.** Patterns of Polymorphism and  
18 Demographic History in Natural Populations of *Arabidopsis lyrata*. *PLOS ONE* 5: 8. doi:  
19 10.1371/journal.pone.0002411.
- 20 **Sakuma Y, et al. 2006.** Functional Analysis of an Arabidopsis Transcription Factor,  
21 DREB2A, Involved in Drought-Responsive Gene Expression. *The Plant Cell Journal* **18**:  
22 1292–1309.

- 1 **Schreiber U, Schliwa U, Bilger W. 1986.** Continuous recording of photochemical and  
2 non-photochemical chlorophyll fluorescence quenching with a new type of modulation  
3 fluorometer. *Photosynthesis Research* **10**: 51-62.
- 4 **Seki M, Narusaka M, Abe H, et al. 2001.** Monitoring the expression pattern of 1300  
5 Arabidopsis genes under drought and cold stresses by using a full-length cDNA  
6 microarray. *Plant Cell* **13**: 61-7.
- 7 **Seki M, Narusaka, M, Ishida J, et al. 2002.** Monitoring the expression profiles of 7000  
8 Arabidopsis genes under drought, cold and high-salinity stresses using a full-length  
9 cDNA micro-array. *The Plant Journal* **31**: 279-292.
- 10 **Shinozaki K, Yamaguchi-Shinozaki K. 2007.** Gene networks involved in drought stress  
11 response and tolerance. *Journal of Experimental Botany* **58**: 221-7.
- 12 **Sletvold N, Agren J. 2012.** Variation in tolerance to drought among Scandinavian  
13 populations of *Arabidopsis lyrata*. *Evolutionary Ecology* **26**: 559-77.
- 14 **Sreenivasulu N, Harshavardhan VT, Govind G, Seiler C, Kohli A. 2012.** Contrapuntal  
15 role of ABA: Does it mediate stress tolerance or plant growth retardation under long-term  
16 drought stress? *Gene* **506**: 265–273.
- 17 **Stebbins GL. 1952.** Aridity as a stimulus to plant evolution. *The American Naturalist* **86**:  
18 33-44.
- 19 **Stein Ricardo J, Hoereth S, Romário J, de Melo F, et al. 2017.** Relationships between  
20 soil and leaf mineral composition are element-specific, environment-dependent and  
21 geographically structured in the emerging model *Arabidopsis halleri*. *New phytologist*  
22 **213** (3): 1274-1286.

- 1 **Steven FJ. 2011.** Plasticity and evolution in drought avoidance and escape in the annual  
2 plant *Brassica rapa*. *New Phytologist* **190**: 249–257.
- 3 **Stolpe C, Krämer U, Müller C. 2016.** Heavy metal hyper-accumulation in leaves of  
4 *Arabidopsis halleri* is accompanied by a reduced performance of herbivores and shifts in  
5 leaf glucosinolate and element concentrations. *Environmental and Experimental Botany*  
6 **133**: 78-86.
- 7 **Sugiyama, S.-i. 2006.** Responses of shoot growth and survival to water stress gradient in  
8 diploid and tetraploid populations of *Lolium multiflorum* and *L. perenne*. *Grassland*  
9 *Science* **52**: 155–160.
- 10 **Szabados L, Savouré A. 2010.** Proline: a multifunctional amino acid. *Trends in Plant*  
11 *Science* **15**: 89–97.
- 12 **The 1001 Genomes Consortium 2016.** 1135 genomes reveal the global pattern of  
13 polymorphism in *Arabidopsis thaliana*. *Cell* **166**: 481–491.
- 14 **Tonsor SJ, Alonso-Blanco C, Koornneef M. 2005.** Gene function beyond the single  
15 trait: natural variation, gene effects, and evolutionary ecology in *Arabidopsis thaliana*.  
16 *Plant Cell and Environment* **28**: 2–20.
- 17 **Urano K, Maruyama K, Jikumaru Y, Kamiya Y, Yamaguchi-Shinozaki K,**  
18 **Shinozaki K. 2017.** Analysis of plant hormone profiles in response to moderate  
19 dehydration stress. *The Plant Journal* **90**: 17–36.
- 20 **Verslues PE, Juenger TE. 2011.** Drought, metabolites, and *Arabidopsis* natural  
21 variation: a promising combination for understanding adaptation to water-limited  
22 environments. *Current Opinion in Plant Biology* **14**: 240–245.



- 1 **Wang JZ, et al. 2007.** A new method to measure the semantic similarity of GO terms.  
2 *Bioinformatics* **23**(10): 1274–1281.
- 3 **Wehmeyer N, Vierling E. 2000.** The expression of small heat shock proteins in seeds  
4 responds to discrete developmental signals and suggests a general protective role in  
5 desiccation tolerance. *Plant Physiology* **122**: 1099–1108.
- 6 **Wickham H, 2009.** ggplot2: elegant graphics for data analysis. *New York: Springer-*  
7 *Verlag.*
- 8 **Willems G, Dräger DB, Courbot M, Godé C, Verbruggen N, Saumitou-Laprade P.**  
9 **2007.** The Genetic Basis of Zinc Tolerance in the Metallophyte *Arabidopsis halleri* ssp.  
10 *halleri* (Brassicaceae): An Analysis of Quantitative Trait Loci. *Genetics* **176**: 659–674.
- 11 **Wu CA, Lowry DB, Nutter LI, Willis JH. 2010.** Natural variation for drought response  
12 traits in the *Mimulus guttatus* species complex. *Oecologia* **162**(1): 23–33.
- 13 **Yoshida Y, et al. 1999.** Stress-responsive and developmental regulation of Delta (1)-  
14 pyrroline-5-carboxylate synthetase 1 (P5CS1) gene expression in *Arabidopsis thaliana*.  
15 *Biochemical and Biophysical Research Communications* **261**(3):766-772.
- 16 **Yoshida T, Mogami J, Yamaguchi-Shinozaki K. 2014.** ABA-dependent and ABA  
17 independent signaling in response to osmotic stress in plants. *Current Opinion in Plant*  
18 *Biology* **21**: 1–7.
- 19 **Yu G. 2010.** GOSemSim: an R package for measuring semantic similarity among GO  
20 terms and gene products. *Bioinformatics* **26** (7): 976–978.
- 21 **Yue B, Xue W, Xiong L, Yu X, Luo L, et al. 2006.** Genetic basis of drought resistance  
22 at reproductive stage in rice: separation of drought tolerance from drought avoidance.  
23 *Genetics* **172**: 121-328.

## 1 LEGENDS OF FIGURES

2 **Figure 1:** Stomata density and  $\delta^{13}\text{C}$  measured in *Arabidopsis halleri* and *A. lyrata* grown  
3 under well-watered conditions. (A) Abaxial stomatal density. (B)  $\delta^{13}\text{C}$  measured for the  
4 same plants. Violin plots with the same letter are not significantly different according to  
5 Tukey's HSD (P value <0.05).

6 **Figure 2:** Typical phenotypes of wilting observed in *Arabidopsis halleri*, *A. lyrata*, and  
7 *A. thaliana*. Plant morphology before the water withdrawal treatment (top row) and at  
8 wilting (bottom row) for *A. halleri* (a, d), *A. lyrata* (b, e) and *A. thaliana* (c, f). All plants  
9 were grown in 7cm pots. One single plant was grown in each 7cm pots.

10 **Figure 3:** Wilting day and soil moisture at wilting for *Arabidopsis halleri*, *A. lyrata*, and  
11 *A. thaliana*. (A) Number of days between initiation of soil dry-down treatment and  
12 wilting. (B) Soil moisture at wilting. Letters above violin plots indicate significant  
13 differences between species (*Tukey's HSD test*, P value <0.05). Results are shown for the  
14 first biological experiment.

15 **Figure 4:** Correlations between desiccation rate and initial leaf size and desiccation rate  
16 and the relative leaf water loss. (A) Correlation between the initial rosette leaf area (at  
17 60% of soil moisture) and the percentage of soil desiccation rate (Pearson correlation  
18 coefficients and p values for: *Arabidopsis thaliana* (r = 0.32, P value = 0.013); *A. lyrata* (r  
19 = 0.14, P value = 0.22) and *A. halleri* (r = 0.48, P value = 0.00072). (B) Correlation  
20 between the relative water loss in leaves before wilting (equivalent to the ratio of leaf  
21 thickness day 2 : day 7 before wilting) and the desiccation rate (Pearson correlation  
22 coefficients and p values for: *A. thaliana* (r = 0.018, P value = 0.732); *A. lyrata* (r =  
23 0.023, P value = 0.692) and *A. halleri* (r = 0.39, P value =  $4.282 \cdot 10^{-08}$ ). Results are shown

1 for the second biological experiment. Lines represent a linear regression smoothing where  
2 the shaded ribbons represent the standard error.

3 **Figure 5:** Leaf thickness in response to decrease of soil moisture for *Arabidopsis*  
4 *thaliana*, *A. halleri*, and *A. lyrata*. Results were collected in the second biological  
5 experiment. Shaded ribbons represent the standard deviation. Filled triangles correspond  
6 to the average wilting soil moisture for the different species.

7 **Figure 6:** Relative leaf water loss seven days before wilting in *Arabidopsis halleri*, *A.*  
8 *lyrata*, and *A. thaliana*. This is equivalent to the ratio of leaf thickness at day two vs day  
9 seven before wilting. Boxplots with the same letter are not significantly different (*Tukey's*  
10 *HSD*,  $P$  value  $<0.05$ ). Results are shown for the second biological experiment.

11 **Figure 7:** Average survival rate after re-watering following two to six days of wilting for  
12 *Arabidopsis halleri*, *A. lyrata*, and *A. thaliana*. Results are shown for the first biological  
13 replicate. Barplots with one star or more are significantly different (*Tukey's HSD*, *Signif.*  
14 *codes*: ;  $P < 0.1$  ; \*,  $P < 0.05$ ; \*\*,  $P < 0.01$ ; \*\*\*,  $P < 0.001$ ; ns, not significant).

15 **Figure 8:** Damage scored on survivors to two days of wilting after resuming growth for  
16 *Arabidopsis halleri*, *A. lyrata*, and *A. thaliana*. . Results are shown for the second  
17 biological experiment. Barplots with one star or more are significantly different (*Tukey's*  
18 *HSD*, *Signif. codes*: ;  $P < 0.1$  ; \*,  $P < 0.05$ ; \*\*,  $P < 0.01$ ; \*\*\*,  $P < 0.001$ ; ns, not  
19 significant).

## 20 **Supporting Information**

21 **Figure S1:** Summary of short read mapping to the *A. lyrata* reference genome V1.

22 **Figure S2:** Wilting day and soil moisture at wilting for the two first biological  
23 experiments of the drying-down experiments.

- 1 **Figure S3:** Soil water content during the first 7 days after water withdrawal.
- 2 **Figure S4:** Initial rosette area and leaf thickness of the plants used in the second
- 3 biological experiments of the drying-down experiment.
- 4 **Figure S5:** Photosynthesis efficiency at wilting.
- 5 **Figure S6:** Proportion of surviving *A. halleri*, *A. lyrata*, and *A. thaliana* plants 2 days after
- 6 re-watering for the two first biological experiments.
- 7 **Table S1:** List of accessions used for the dry-down experiments.
- 8 **Table S2:** Phenotypes measured in the three drying-down experiments.
- 9 **Table S3:** Number of accessions used in the three drying-down experiments.
- 10 **Table S4:** Summary statistics of the multiple comparison of the wilting day between
- 11 species.
- 12 **Table S5:** Summary statistics of the multiple comparison of the soil moisture at wilting
- 13 between species.
- 14 **Table S6:** Summary statistics of the multiple comparison of the initial rosette area
- 15 between species.
- 16 **Table S7:** Summary statistics of the multiple comparison of the initial leaf thickness
- 17 between species.
- 18 **Table S8:** Summary statistics of the multiple comparison of the relative leaf water loss 7
- 19 days before wilting between species.
- 20 **Table S9:** Summary statistics of glm testing the effect of interaction between species and
- 21 desiccation rate on the relative loss of leaf water content before wilting.

1 **Table S10:** Summary statistics of the multiple comparison of the photosynthetic  
2 efficiency at wilting between species.

3 **Table S11:** Summary statistics of the multiple comparison of the survival rate 2 days after  
4 re-watering between species.

5 **Table S12:** Differentially expressed genes identified for each of *Arabidopsis halleri* and  
6 *A. lyrata* between 20 and 60% of soil moisture and between recovery and 60% of soil  
7 moisture.

8 **Table S13:** Phenotypic data collected in this study. See methods for details on the  
9 measurements and experimental procedures.

10

11

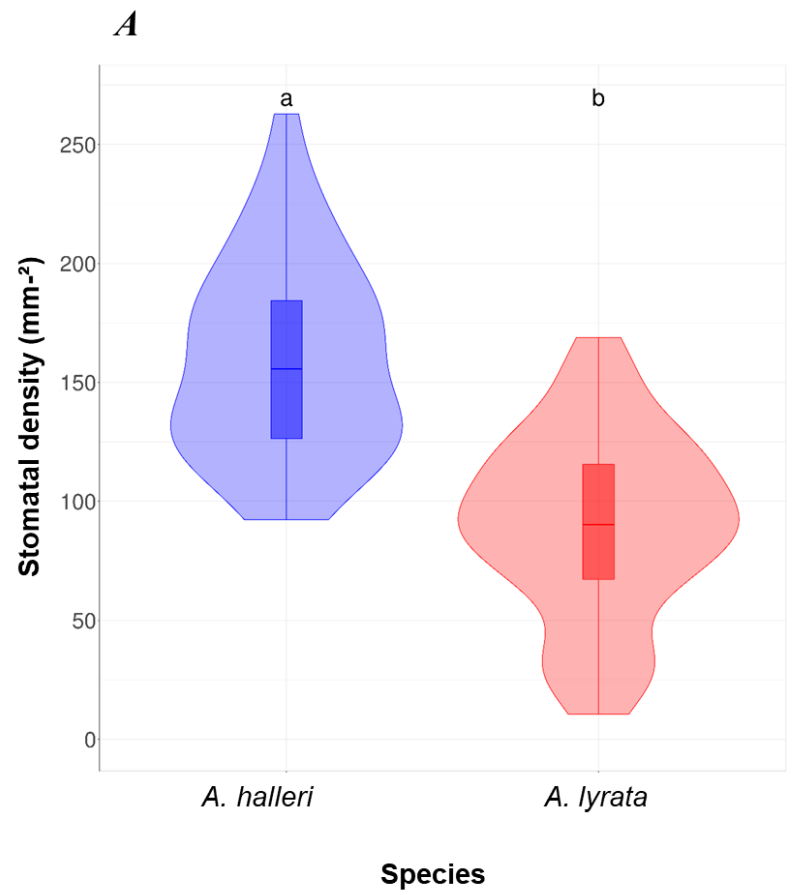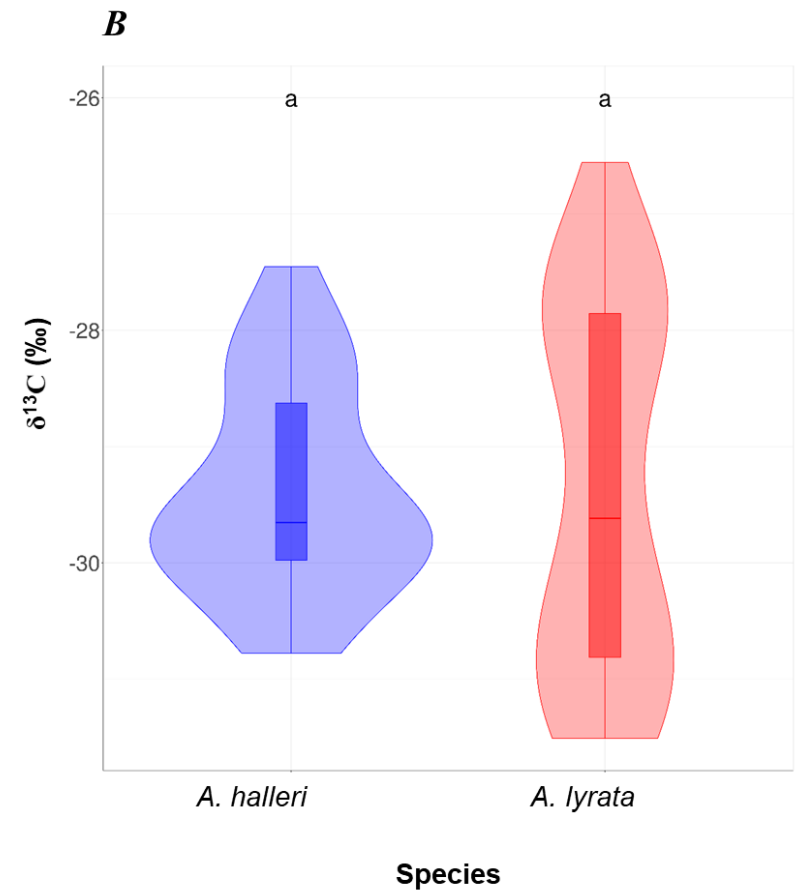

Fig. 1



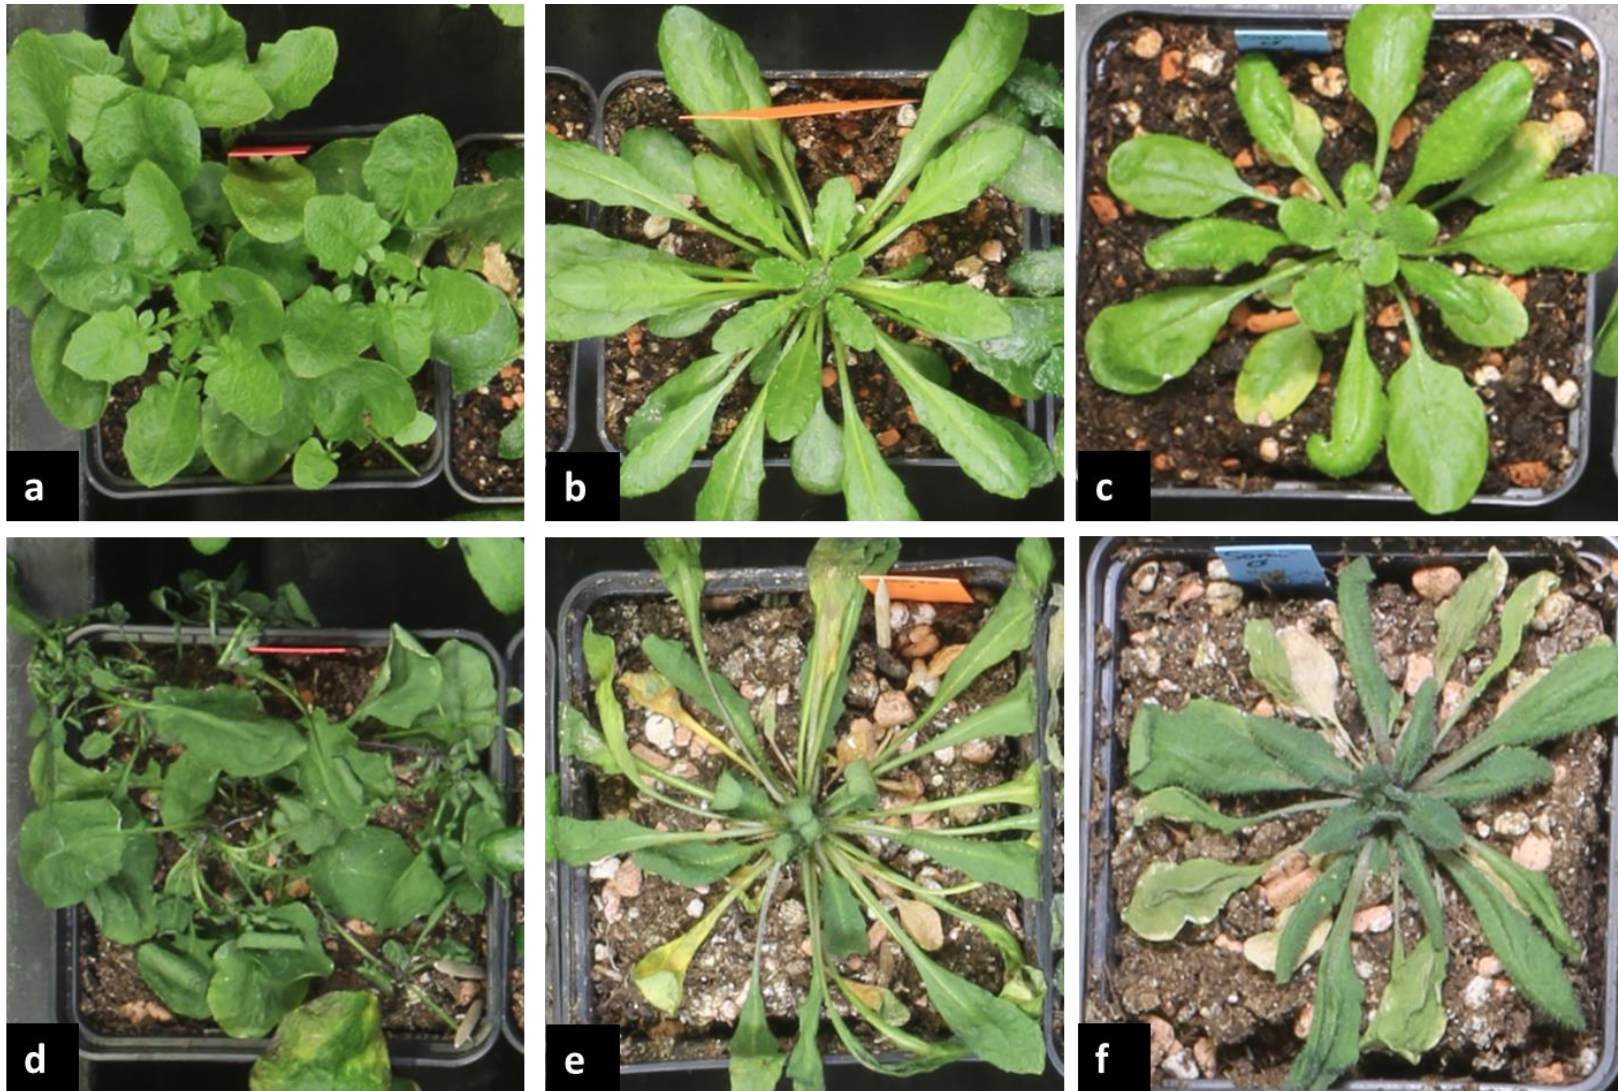

Fig. 2

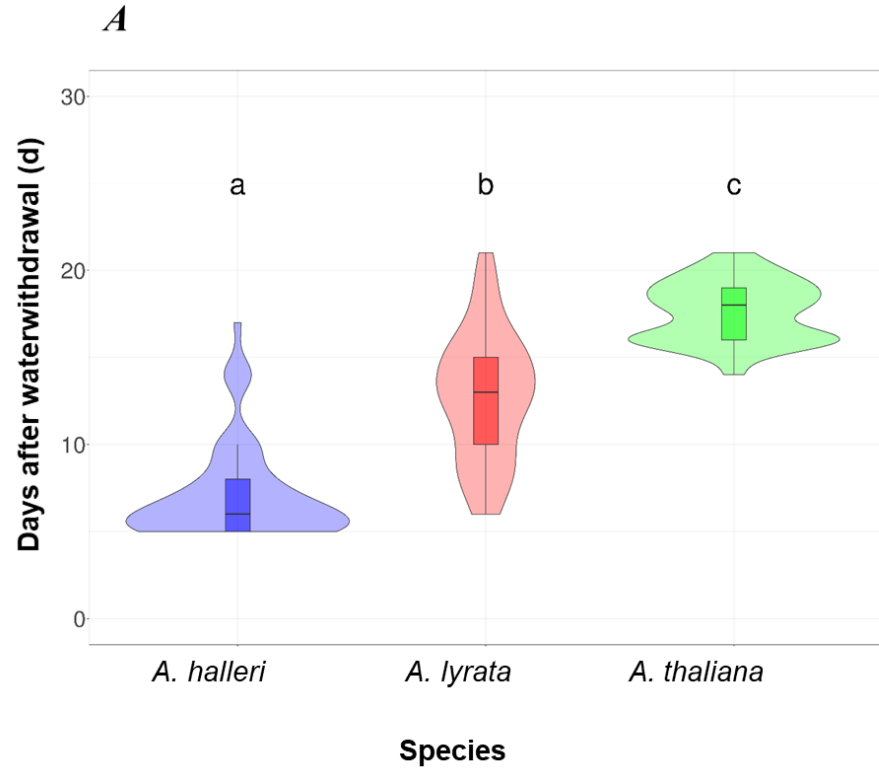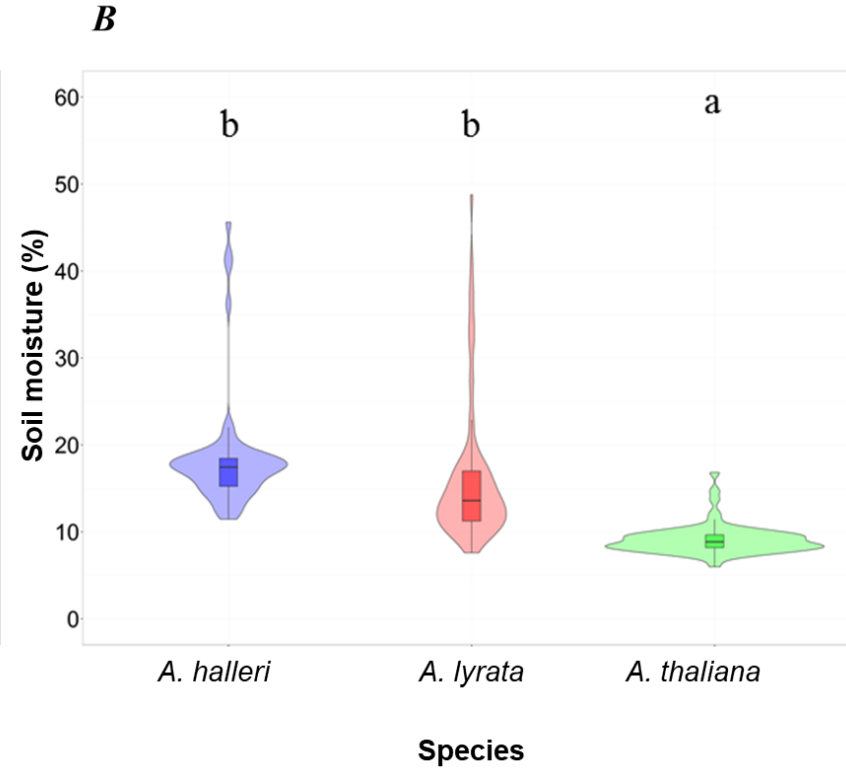

Fig. 3



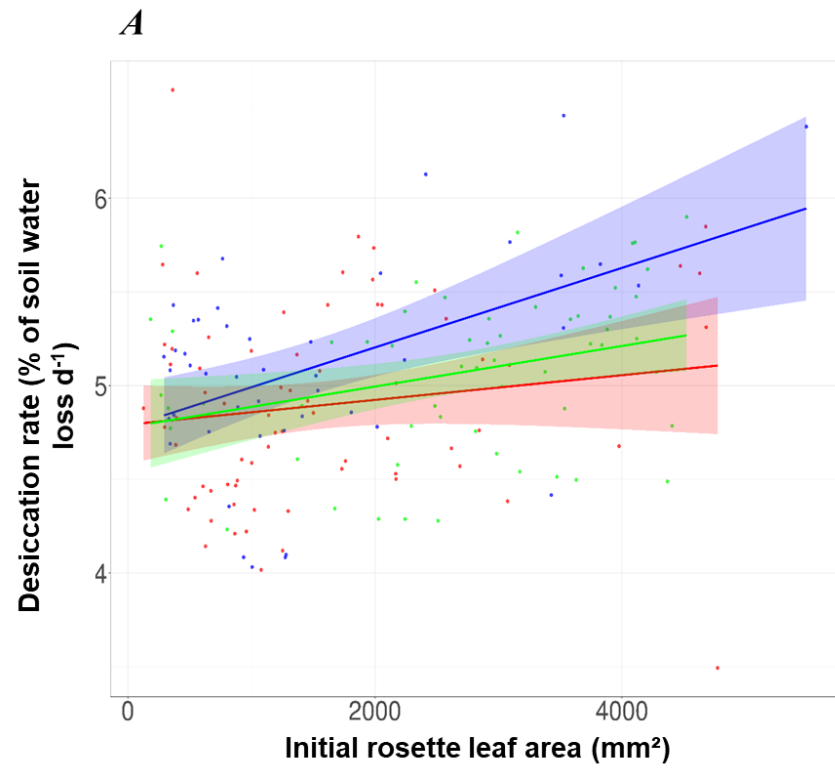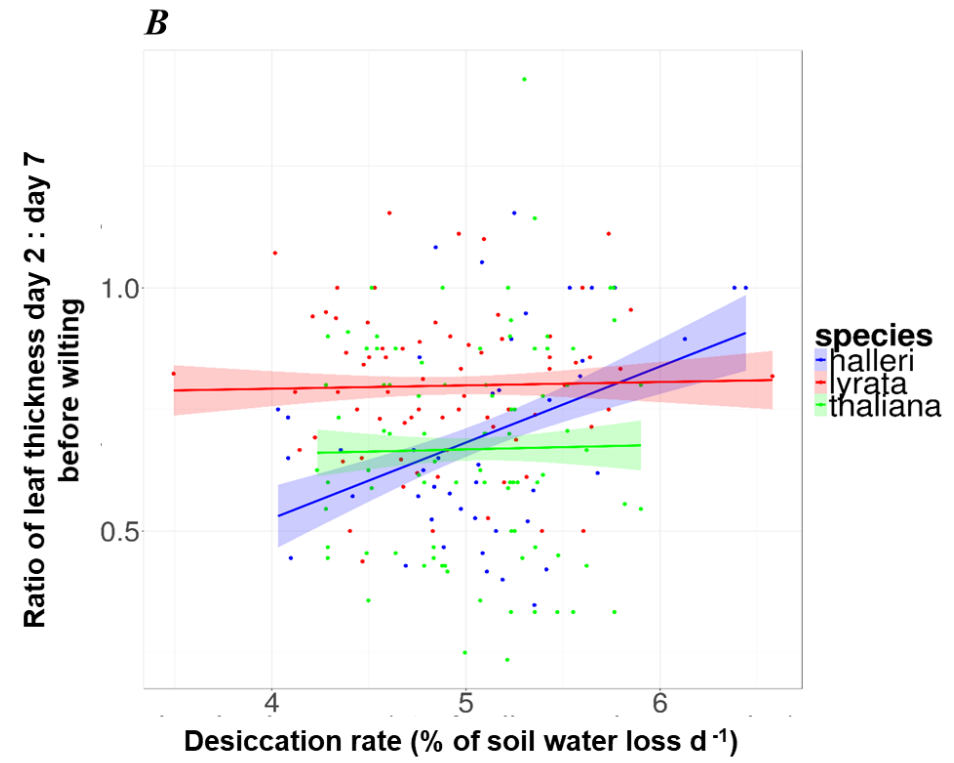

Fig. 4

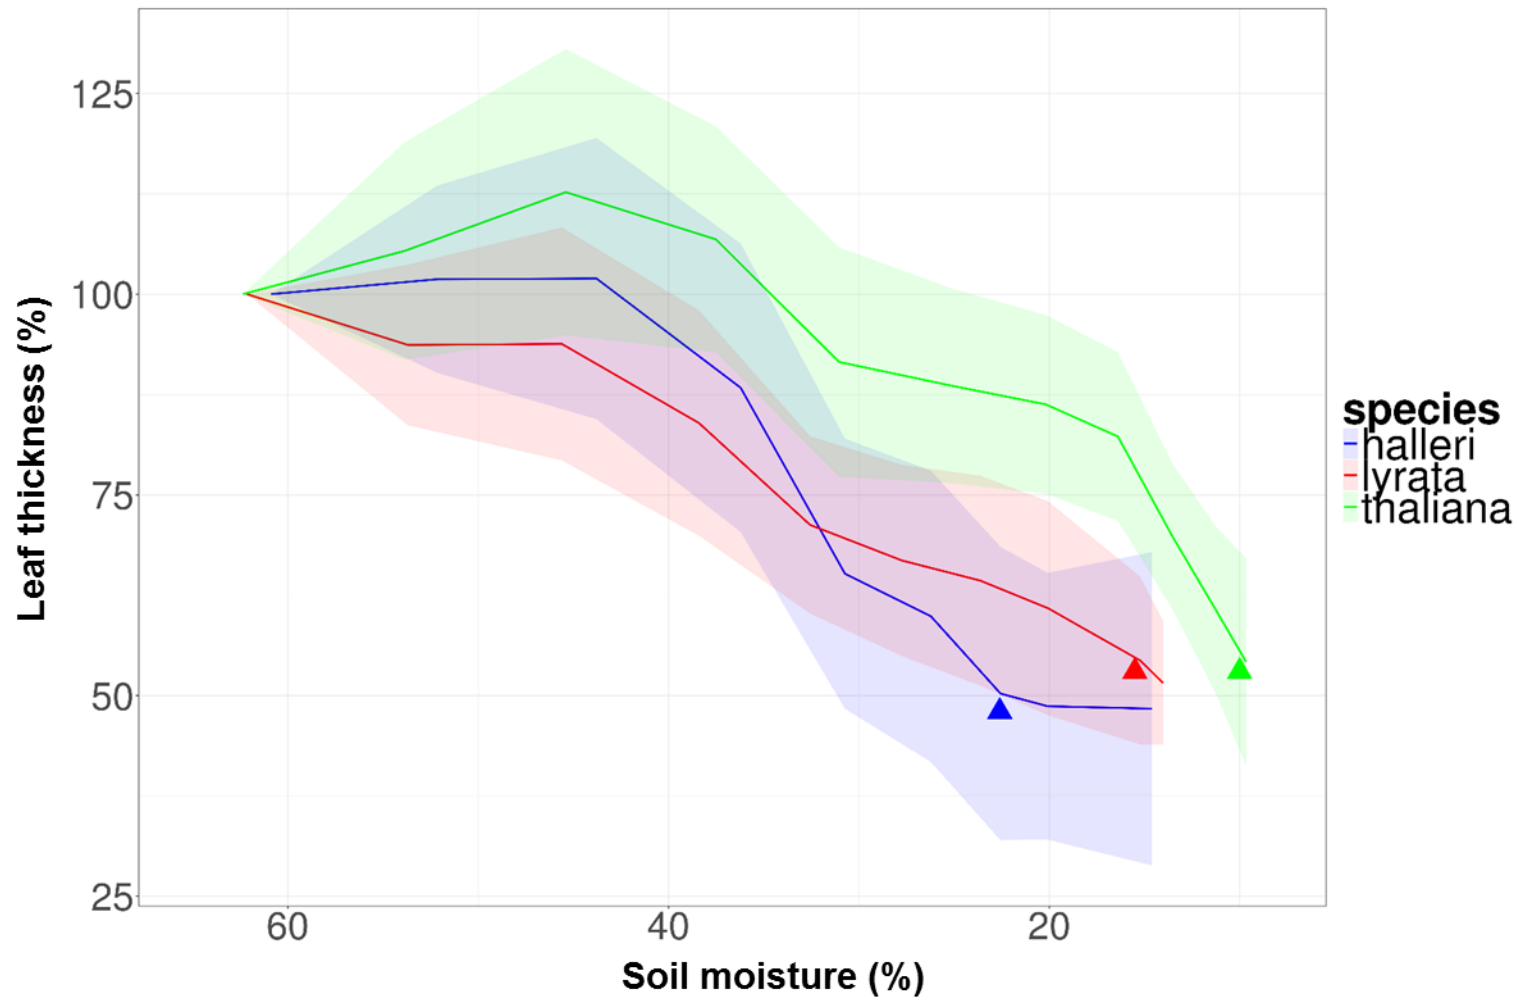

Fig. 5

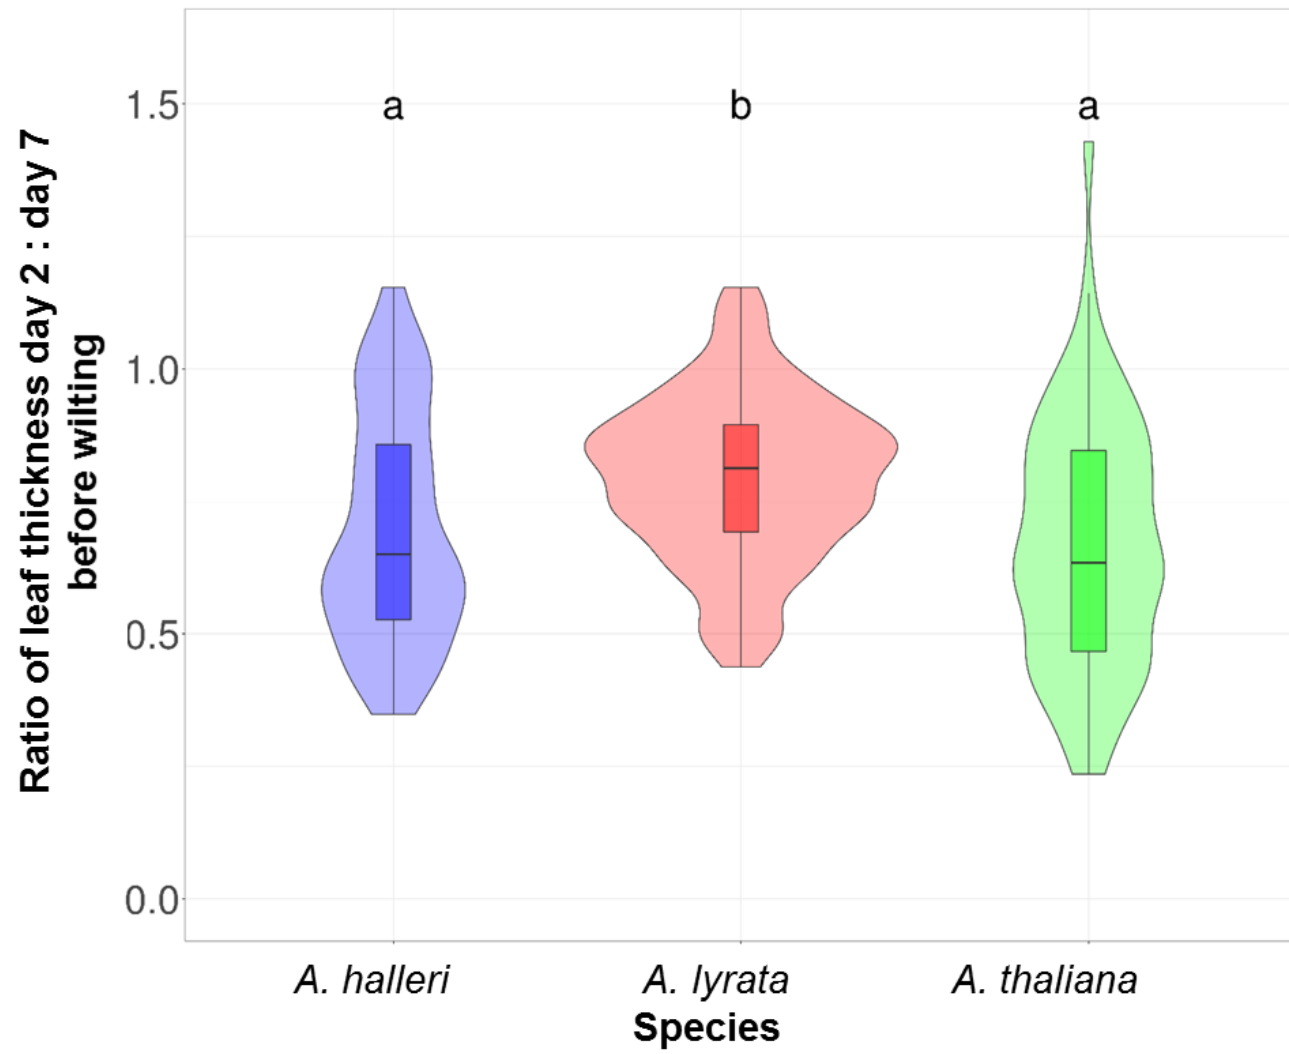

Fig. 6

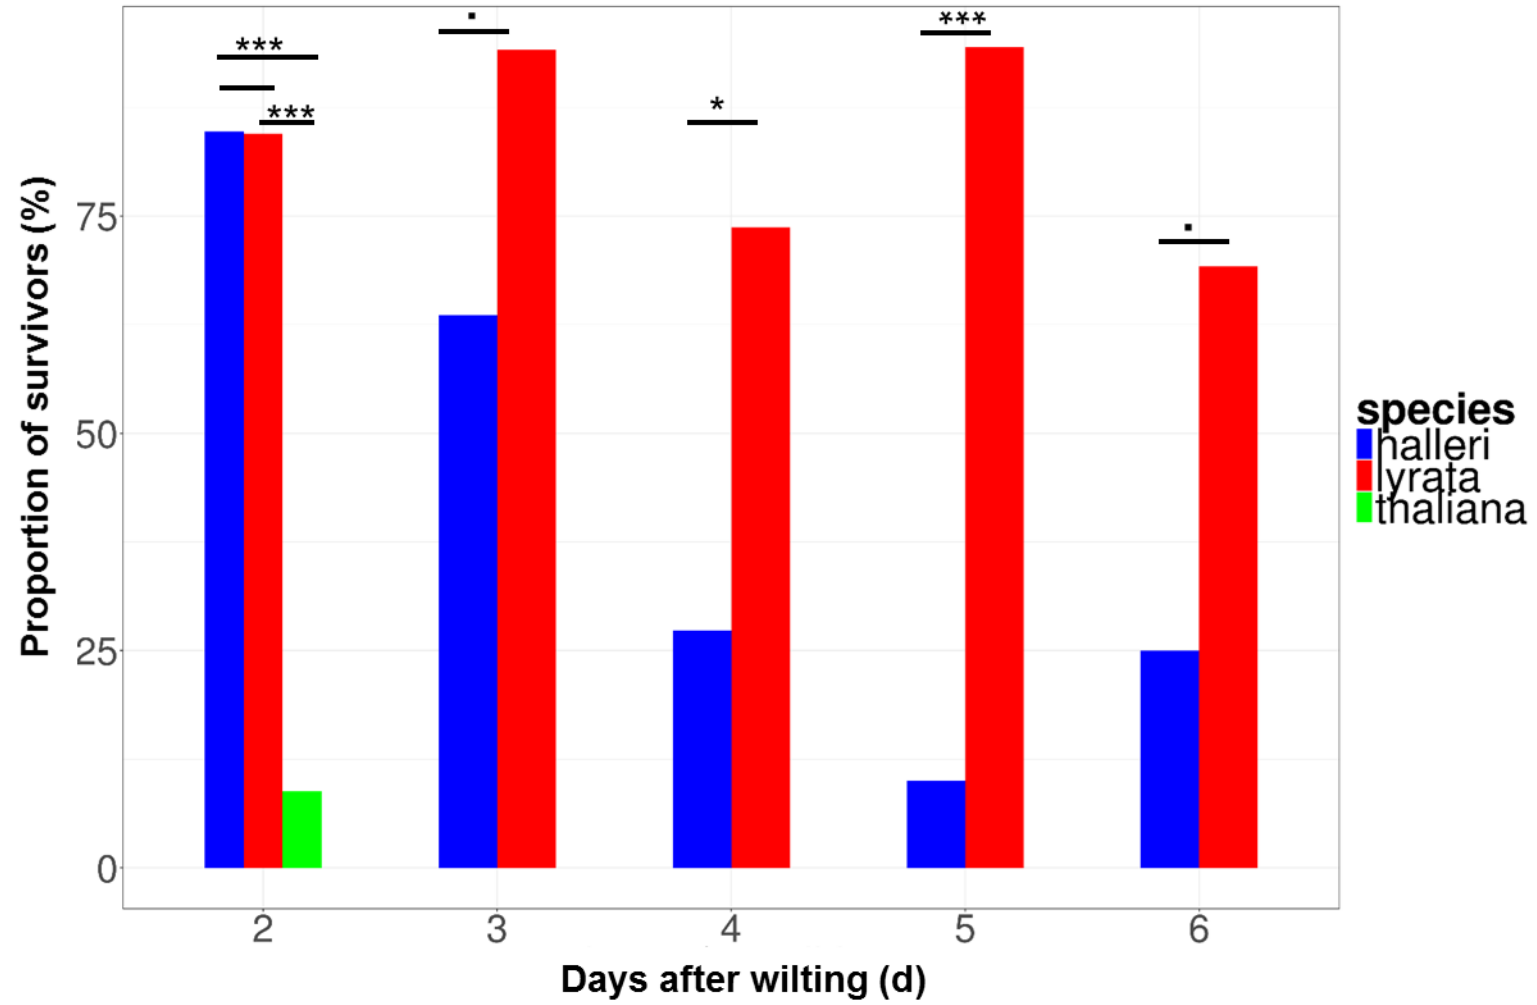

Fig. 7

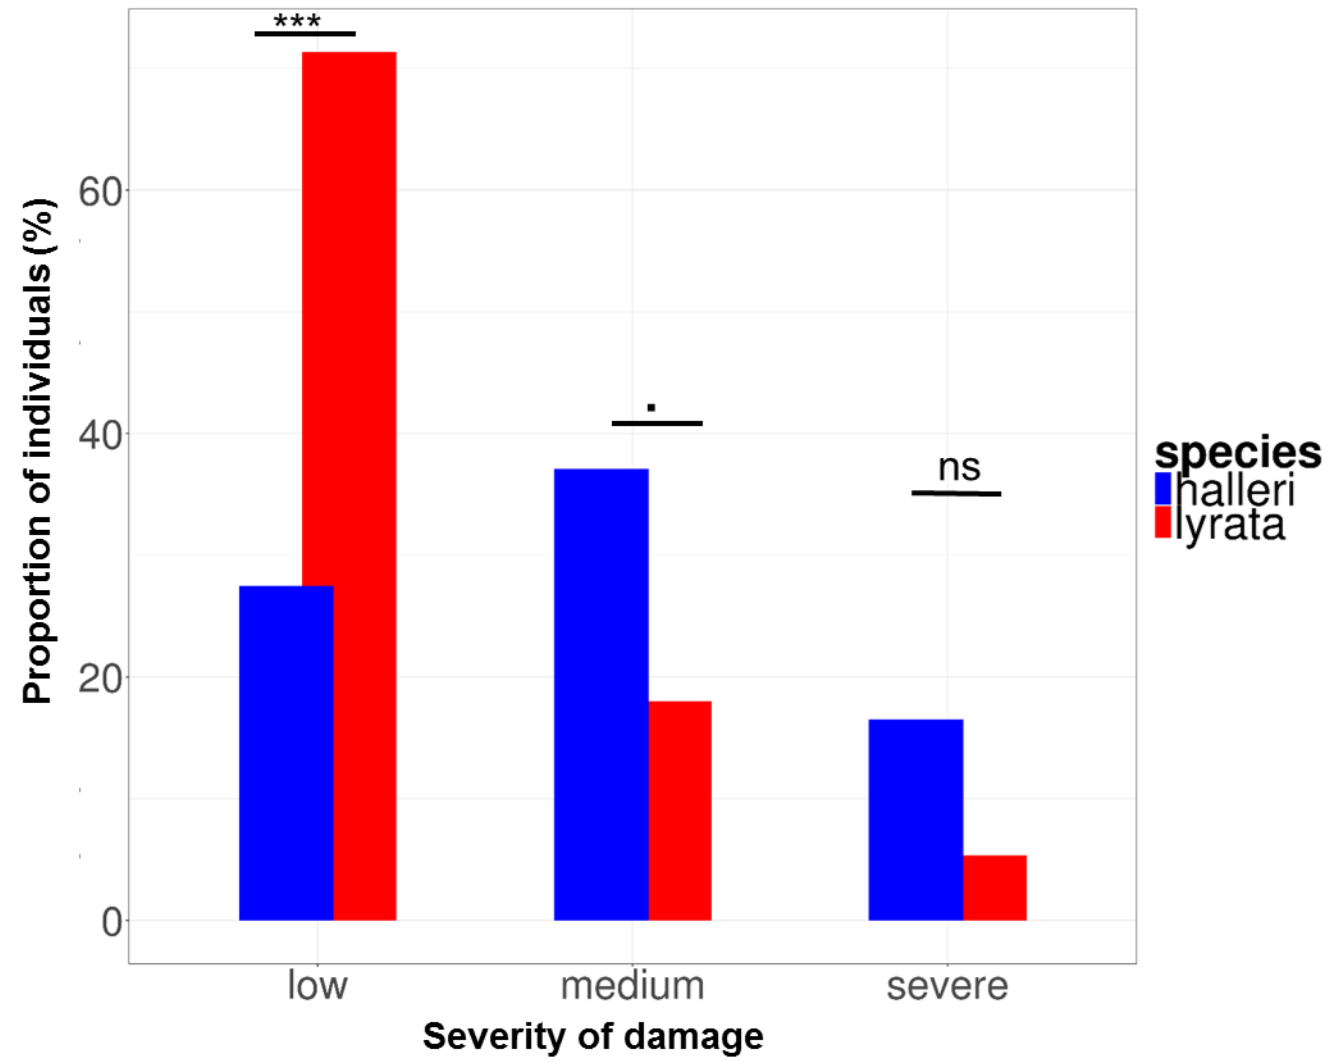

Fig. 8
